# Supplementary material for: Nomogram of baseline CT-radiomics from small-cell lung cancer patients: evaluation of added prognostic value for overall survival and probability of distant metastasis
Source: Research Square preprint supplement (doi:10.21203/rs.3.rs-2276560/v1), 2022-11-28
Supplement: Supplementary file 1 [file 592e72edc7b87d3979b5c9a3.xlsx]

## Sheet: FirstFeatures
				F1-GrayLevelCooccurenceMatrix25	F1-GrayLevelCooccurenceMatrix25	F1-GrayLevelCooccurenceMatrix25	F1-GrayLevelCooccurenceMatrix25	F1-GrayLevelCooccurenceMatrix25	F1-GrayLevelCooccurenceMatrix25	F1-GrayLevelCooccurenceMatrix25	F1-GrayLevelCooccurenceMatrix25	F1-GrayLevelCooccurenceMatrix25	F1-GrayLevelCooccurenceMatrix25	F1-GrayLevelCooccurenceMatrix25	F1-GrayLevelCooccurenceMatrix25	F1-GrayLevelCooccurenceMatrix25	F1-GrayLevelCooccurenceMatrix25	F1-GrayLevelCooccurenceMatrix25	F1-GrayLevelCooccurenceMatrix25	F1-GrayLevelCooccurenceMatrix25	F1-GrayLevelCooccurenceMatrix25	F1-GrayLevelCooccurenceMatrix25	F1-GrayLevelCooccurenceMatrix25	F1-GrayLevelCooccurenceMatrix25	F1-GrayLevelCooccurenceMatrix25	F1-GrayLevelCooccurenceMatrix25	F1-GrayLevelCooccurenceMatrix25	F1-GrayLevelCooccurenceMatrix25	F1-GrayLevelCooccurenceMatrix25	F1-GrayLevelCooccurenceMatrix25	F1-GrayLevelCooccurenceMatrix25	F1-GrayLevelCooccurenceMatrix25	F1-GrayLevelCooccurenceMatrix25	F1-GrayLevelCooccurenceMatrix25	F1-GrayLevelCooccurenceMatrix25	F1-GrayLevelCooccurenceMatrix25	F1-GrayLevelCooccurenceMatrix25	F1-GrayLevelCooccurenceMatrix25	F1-GrayLevelCooccurenceMatrix25	F1-GrayLevelCooccurenceMatrix25	F1-GrayLevelCooccurenceMatrix25	F1-GrayLevelCooccurenceMatrix25	F1-GrayLevelCooccurenceMatrix25	F1-GrayLevelCooccurenceMatrix25	F1-GrayLevelCooccurenceMatrix25	F1-GrayLevelCooccurenceMatrix25	F1-GrayLevelCooccurenceMatrix25	F1-GrayLevelCooccurenceMatrix25	F1-GrayLevelCooccurenceMatrix25
Index	Patients Name	是否转移	MRN	-333-1AutoCorrelation	-333-4AutoCorrelation	-333-7AutoCorrelation	0-1AutoCorrelation	0-4AutoCorrelation	0-7AutoCorrelation	45-1AutoCorrelation	45-4AutoCorrelation	45-7AutoCorrelation	90-1AutoCorrelation	90-4AutoCorrelation	90-7AutoCorrelation	135-1AutoCorrelation	135-4AutoCorrelation	135-7AutoCorrelation	180-1AutoCorrelation	180-4AutoCorrelation	180-7AutoCorrelation	225-1AutoCorrelation	225-4AutoCorrelation	225-7AutoCorrelation	270-1AutoCorrelation	270-4AutoCorrelation	270-7AutoCorrelation	315-1AutoCorrelation	315-4AutoCorrelation	315-7AutoCorrelation	-333-1ClusterProminence	-333-4ClusterProminence	-333-7ClusterProminence	0-1ClusterProminence	0-4ClusterProminence	0-7ClusterProminence	45-1ClusterProminence	45-4ClusterProminence	45-7ClusterProminence	90-1ClusterProminence	90-4ClusterProminence	90-7ClusterProminence	135-1ClusterProminence	135-4ClusterProminence	135-7ClusterProminence	180-1ClusterProminence	180-4ClusterProminence	180-7ClusterProminence	225-1ClusterProminence
D1	BI GUI PING	1	1276901	2143.99	2061.76	1996.39	2152.76	2091.93	2046.22	2142.45	2067.71	2027.66	2141.87	2059.6	1974.41	2138.59	2022.11	1918.53	2152.76	2091.93	2046.22	2142.45	2067.71	2027.66	2141.87	2059.6	1974.41	2138.59	2022.11	1918.53	1.59945e+06	887297	485103	1.65149e+06	1.10817e+06	734119	1.54594e+06	738346	346526	1.63516e+06	913369	430052	1.56199e+06	740611	323283	1.65149e+06	1.10817e+06	734119	1.54594e+06
D2	BI RU BAO	0	1288053	2297.17	2311.93	2306.35	2294.86	2311.59	2309.95	2297.12	2310.02	2307.68	2294.4	2309.36	2307.89	2302.39	2316.98	2298.98	2294.86	2311.59	2309.95	2297.12	2310.02	2307.68	2294.4	2309.36	2307.89	2302.39	2316.98	2298.98	604203	261401	161281	621731	259757	127173	591294	279618	204613	643258	344573	225804	558547	151346	81771.1	621731	259757	127173	591294
D3	BI YE LING	1	1199949	2147.55	2082.65	2019.96	2153.78	2095.47	2025.18	2145.81	2064.55	1981.05	2148.86	2102.67	2063.05	2141.6	2065.08	2002.08	2153.78	2095.47	2025.18	2145.81	2064.55	1981.05	2148.86	2102.67	2063.05	2141.6	2065.08	2002.08	3.05411e+06	1.64482e+06	1e+06	3.17836e+06	2.06427e+06	1.43104e+06	2.95078e+06	1.27579e+06	694599	3.09687e+06	1.69352e+06	893858	2.98553e+06	1.47875e+06	858945	3.17836e+06	2.06427e+06	1.43104e+06	2.95078e+06
D4	CAO TONG YOU	0	1115865	2468.22	2468.54	2451.96	2466.58	2471	2462.4	2466.91	2465.67	2459.84	2467.19	2466.18	2451.82	2472.32	2471.49	2428.71	2466.58	2471	2462.4	2466.91	2465.67	2459.84	2467.19	2466.18	2451.82	2472.32	2471.49	2428.71	212242	52237	44527.3	217181	46210.9	43336.9	209293	61393.5	61842.6	263688	61819.1	39234.3	156090	38038.2	34523.7	217181	46210.9	43336.9	209293
D5	CAO ZHI QIANG	0	376864	2065.17	2064.96	2041.45	2063.96	2070.45	2048.36	2070.6	2057.34	1992.02	2065.18	2071.96	2071.84	2060.98	2058.34	2036.43	2063.96	2070.45	2048.36	2070.6	2057.34	1992.02	2065.18	2071.96	2071.84	2060.98	2058.34	2036.43	315953	110328	85811.8	339651	106039	73496.1	296648	127077	114960	332121	113326	83653.2	293871	95301.1	73301	339651	106039	73496.1	296648
D6	CHANG YU PING	1	333234	2149.73	2140.05	2132.05	2147.88	2142.1	2131.44	2149.5	2130.45	2128.32	2149.7	2150.7	2132.05	2151.86	2135.52	2136.65	2147.88	2142.1	2131.44	2149.5	2130.45	2128.32	2149.7	2150.7	2132.05	2151.86	2135.52	2136.65	1.01657e+06	381337	233126	1.03908e+06	328287	136323	916816	296181	217261	1.09083e+06	533326	303993	1.01556e+06	353627	274449	1.03908e+06	328287	136323	916816
D7	CHANG ZENG SHENG	0	389795	1683.54	1606.65	1538.83	1689.58	1630.47	1570.78	1676.69	1570.61	1462.96	1683.98	1616.66	1560.62	1683.78	1605.08	1546.32	1689.58	1630.47	1570.78	1676.69	1570.61	1462.96	1683.98	1616.66	1560.62	1683.78	1605.08	1546.32	1.9012e+06	1.38979e+06	1.04117e+06	1.92821e+06	1.47862e+06	1.18204e+06	1.85779e+06	1.1985e+06	740105	1.92769e+06	1.50899e+06	1.1657e+06	1.88987e+06	1.34846e+06	1.01536e+06	1.92821e+06	1.47862e+06	1.18204e+06	1.85779e+06
D8	CHEN DE GUO	1	1212853	2012.7	1973.08	1928.6	2014.54	1986.11	1909.64	2009.91	1961.9	1894.18	2010.94	1985.35	1961.76	2015.38	1956.31	1938.85	2014.54	1986.11	1909.64	2009.91	1961.9	1894.18	2010.94	1985.35	1961.76	2015.38	1956.31	1938.85	435183	123102	83684.4	452391	147557	69242.5	419030	104889	90148.1	465614	156990	99622.7	401870	77912.6	73632.3	452391	147557	69242.5	419030
D9	CHEN EN JIANG	0	345901	2339.42	2338.92	2334.78	2340.11	2339.43	2337.13	2341.1	2339.75	2339.72	2338.6	2341.23	2336.78	2337.9	2335.02	2324.86	2340.11	2339.43	2337.13	2341.1	2339.75	2339.72	2338.6	2341.23	2336.78	2337.9	2335.02	2324.86	125604	40919.5	27875.6	120052	22898.2	20646.1	134034	62998	20101.3	149680	56534.4	48476	98259.4	22044.6	18983.5	120052	22898.2	20646.1	134034
D10	CHEN GUANG XIU	0	1351741	2239.29	2206.44	2163.8	2240.38	2231.68	2181.32	2233.86	2193.81	2161.86	2234.37	2208.92	2157.59	2248.75	2187.03	2148.33	2240.38	2231.68	2181.32	2233.86	2193.81	2161.86	2234.37	2208.92	2157.59	2248.75	2187.03	2148.33	612711	232707	137714	623456	250467	129887	628899	254412	148298	652662	260643	127961	540711	153808	149176	623456	250467	129887	628899
D11	CHEN JIN LIANG	0	365848	2335.02	2324.29	2306.08	2335.7	2334.8	2323.62	2337.83	2326.31	2309.64	2332.98	2322.28	2300.69	2333.56	2313.16	2288.49	2335.7	2334.8	2323.62	2337.83	2326.31	2309.64	2332.98	2322.28	2300.69	2333.56	2313.16	2288.49	1.05278e+06	562864	342615	1.08525e+06	680973	477523	1.00865e+06	537048	318254	1.10175e+06	595052	320043	1.01369e+06	429544	239344	1.08525e+06	680973	477523	1.00865e+06
D12	CHEN WAN HUI	0	1164974	1531.93	1491.36	1372.31	1537.86	1476.97	1316.99	1546.44	1492.77	1238.11	1516.39	1523.02	1476.77	1527.8	1460.74	1353.8	1537.86	1476.97	1316.99	1546.44	1492.77	1238.11	1516.39	1523.02	1476.77	1527.8	1460.74	1353.8	335662	137739	130886	323447	82408.8	78506.7	336361	151865	55025.7	398403	216126	165559	274780	71556.2	242812	323447	82408.8	78506.7	336361
D13	CHEN WEI DONG	0	385963	2299.26	2226.92	2152.9	2298.68	2230.53	2152.29	2294.33	2200.38	2115.76	2305.87	2252.62	2194.85	2298.01	2220.45	2139.3	2298.68	2230.53	2152.29	2294.33	2200.38	2115.76	2305.87	2252.62	2194.85	2298.01	2220.45	2139.3	1.50144e+06	833234	573330	1.54984e+06	981269	622900	1.49871e+06	782028	651732	1.52813e+06	892251	663547	1.42533e+06	631777	260947	1.54984e+06	981269	622900	1.49871e+06
D14	CHENG RU LAN	1	385533	2605.99	2604.62	2603.37	2605	2602.21	2601.15	2605	2604.66	2604.41	2606.79	2607.46	2605.49	2607.15	2604.24	2602.76	2605	2602.21	2601.15	2605	2604.66	2604.41	2606.79	2607.46	2605.49	2607.15	2604.24	2602.76	17517.8	4627.61	3873.59	21158.6	6297.66	4977.19	17534.8	5044.82	2751.52	17517.9	3516.97	3984.12	13758.3	3557.92	3462.05	21158.6	6297.66	4977.19	17534.8
D15	CHENG ZHAN YUAN	0	340258	2384.04	2384.84	2373.67	2384.12	2387.79	2381.5	2384.72	2381.01	2350.12	2379.95	2384.03	2382.75	2387.56	2386.25	2372.94	2384.12	2387.79	2381.5	2384.72	2381.01	2350.12	2379.95	2384.03	2382.75	2387.56	2386.25	2372.94	8907.66	3052.58	3430.27	16412.4	3056.71	1983.94	8325.58	2972.13	3793.94	6480.15	2959.1	3721.73	4177.7	3248.49	4759.86	16412.4	3056.71	1983.94	8325.58
D16	CUI HONG JUN	1	1234098	2387.4	2403.34	2397.61	2382.86	2401.51	2406.7	2385.86	2397.7	2388.39	2385.82	2403.59	2398.99	2395.22	2410.96	2394.82	2382.86	2401.51	2406.7	2385.86	2397.7	2388.39	2385.82	2403.59	2398.99	2395.22	2410.96	2394.82	725617	294104	215910	822104	417973	260302	695340	269865	230824	732079	261855	187018	648300	211704	176963	822104	417973	260302	695340
D17	CUI SHU GUO	1	1232898	2252.36	2243.33	2234.86	2254.57	2254.93	2244.57	2253.7	2230.79	2200.8	2249.27	2239.51	2232.04	2251.93	2246.39	2253.21	2254.57	2254.93	2244.57	2253.7	2230.79	2200.8	2249.27	2239.51	2232.04	2251.93	2246.39	2253.21	545072	222767	150297	559586	276111	243494	490831	195128	124632	590795	249024	136949	535932	163292	85181.7	559586	276111	243494	490831
D18	DING GUI ZHI	0	331553	1949.64	1900.91	1855.6	1952.62	1915.35	1856.09	1956.4	1897.44	1804.99	1947.94	1914.07	1887.1	1941.7	1874.69	1860.12	1952.62	1915.35	1856.09	1956.4	1897.44	1804.99	1947.94	1914.07	1887.1	1941.7	1874.69	1860.12	1.19318e+06	672908	465255	1.21015e+06	697316	450135	1.16848e+06	618796	446643	1.24572e+06	837969	584332	1.14556e+06	518250	361279	1.21015e+06	697316	450135	1.16848e+06
D19	DONG FENG XIANG	0	1092496	1816.8	1812.62	1758.57	1820.74	1846.18	1798.06	1817.78	1816.28	1820.54	1809.46	1801.48	1773.52	1819.38	1784.4	1604.73	1820.74	1846.18	1798.06	1817.78	1816.28	1820.54	1809.46	1801.48	1773.52	1819.38	1784.4	1604.73	1.47219e+06	781509	474321	1.49916e+06	861107	285589	1.47475e+06	699291	645709	1.50742e+06	969890	624960	1.40285e+06	534716	273833	1.49916e+06	861107	285589	1.47475e+06
D20	DONG HUI XIN	0	388226	860.837	808.896	776.995	864.249	821.513	789.754	858.332	810.639	793.841	861.824	808.831	793.235	858.835	793.188	723.829	864.249	821.513	789.754	858.332	810.639	793.841	861.824	808.831	793.235	858.835	793.188	723.829	1.19939e+06	800761	633863	1.22378e+06	853460	649822	1.16662e+06	725931	593205	1.22681e+06	878233	713588	1.17944e+06	731660	546530	1.22378e+06	853460	649822	1.16662e+06
D21	DONG LI XIAN	1	1148360	2029.48	1964.05	1906.67	2034.09	1982.05	1964.7	2021.83	1948.14	1854.59	2030.79	1963.73	1895.26	2030.97	1958.62	1887.43	2034.09	1982.05	1964.7	2021.83	1948.14	1854.59	2030.79	1963.73	1895.26	2030.97	1958.62	1887.43	711638	315535	241976	727014	292057	205979	661226	299407	285166	753753	411197	310871	702387	252177	167360	727014	292057	205979	661226
D22	DONG XIN BING	0	380692	1894.31	1836.19	1800.39	1899.78	1861.24	1827.67	1891.61	1823.35	1799.08	1892.46	1830.47	1784.97	1893.33	1828.25	1787.94	1899.78	1861.24	1827.67	1891.61	1823.35	1799.08	1892.46	1830.47	1784.97	1893.33	1828.25	1787.94	1.8227e+06	1.21153e+06	825236	1.85662e+06	1.39994e+06	1.08106e+06	1.76793e+06	1.0631e+06	723473	1.8503e+06	1.25819e+06	796015	1.81447e+06	1.107e+06	667731	1.85662e+06	1.39994e+06	1.08106e+06	1.76793e+06
D23	DU RUI XIANG	1	337310	2485.02	2427.21	2369.62	2487.77	2441	2388.65	2482.54	2407.42	2343.25	2487.21	2442.29	2392.08	2482.48	2415.74	2348.25	2487.77	2441	2388.65	2482.54	2407.42	2343.25	2487.21	2442.29	2392.08	2482.48	2415.74	2348.25	2.33603e+06	1.64381e+06	1.0169e+06	2.3647e+06	1.83208e+06	1.29443e+06	2.3306e+06	1.54118e+06	877666	2.36368e+06	1.80721e+06	1.20272e+06	2.28438e+06	1.37376e+06	644933	2.3647e+06	1.83208e+06	1.29443e+06	2.3306e+06
D24	DU YU ZHEN	1	354750	2324.9	2332.14	2313.45	2318.68	2326.46	2316.44	2330.35	2329.14	2285.57	2324.91	2338.98	2328.3	2325.82	2334.01	2319.4	2318.68	2326.46	2316.44	2330.35	2329.14	2285.57	2324.91	2338.98	2328.3	2325.82	2334.01	2319.4	208857	74729.6	50274.7	228102	88570.7	56649.6	188305	47803.5	35092.5	219783	74654.8	44224.6	197876	85787.4	65201.7	228102	88570.7	56649.6	188305
D25	FEI SHU ZHEN	0	378699	2557.41	2536.26	2525.15	2562.83	2549.05	2534.75	2559.65	2534.93	2524.15	2551.37	2524.85	2517.41	2555.85	2536.34	2524.34	2562.83	2549.05	2534.75	2559.65	2534.93	2524.15	2551.37	2524.85	2517.41	2555.85	2536.34	2524.34	416229	148704	108065	409573	105543	102134	355436	114259	63824.1	492076	240668	157239	404870	124667	97314.9	409573	105543	102134	355436
D26	FU GUO QI	1	345082	2119.5	1991.96	1907.23	2121.53	2017.76	1930	2123.62	1977.73	1851.06	2128.42	2013.5	1936.89	2103.82	1947.42	1876.9	2121.53	2017.76	1930	2123.62	1977.73	1851.06	2128.42	2013.5	1936.89	2103.82	1947.42	1876.9	3.39446e+06	1.13546e+06	488884	3.48164e+06	1.5055e+06	665151	3.47929e+06	1.23904e+06	405546	3.62959e+06	1.1497e+06	394708	2.97075e+06	563748	445253	3.48164e+06	1.5055e+06	665151	3.47929e+06
D27	GAN QIANG HUA	1	01281453-2	611.441	444.578	367.954	648.853	520.071	429.854	593.093	402.773	314.309	607.083	429.954	369.787	596.055	419.897	348.708	648.853	520.071	429.854	593.093	402.773	314.309	607.083	429.954	369.787	596.055	419.897	348.708	5.60095e+06	4.51083e+06	4.06903e+06	5.92133e+06	5.26623e+06	4.85723e+06	5.45005e+06	4.12011e+06	3.5188e+06	5.52831e+06	4.2341e+06	3.75553e+06	5.4774e+06	4.27971e+06	3.94778e+06	5.92133e+06	5.26623e+06	4.85723e+06	5.45005e+06
D28	GAO EN FENG	1	326938	2407.74	2418.57	2421.65	2405.25	2416.94	2414.88	2408.84	2418.23	2420.44	2405.39	2417.96	2425.22	2411.58	2421.37	2426.04	2405.25	2416.94	2414.88	2408.84	2418.23	2420.44	2405.39	2417.96	2425.22	2411.58	2421.37	2426.04	48499.3	14274.9	10487	41690.9	11267.9	10509.6	44734.9	13566.7	12138.4	76914.1	20987.4	9472.53	29691.5	10579.9	10099.7	41690.9	11267.9	10509.6	44734.9
D29	GAO JI LAN	0	1102435	2257.81	2263.58	2248.45	2258.27	2262.64	2248.78	2257.6	2264.71	2251.26	2252.79	2262.75	2266.95	2262.81	2264.36	2210.69	2258.27	2262.64	2248.78	2257.6	2264.71	2251.26	2252.79	2262.75	2266.95	2262.81	2264.36	2210.69	355775	106085	46574.8	380643	136400	44953.9	320264	109237	57578.8	368054	103922	43163	353707	67060.8	36006	380643	136400	44953.9	320264
D30	GAO ZHI CHENG	1	1262926	2465.4	2476.98	2477.87	2464.26	2477.47	2479.84	2466.35	2479.52	2482.32	2462.92	2472.93	2473.2	2468.13	2478.25	2476.44	2464.26	2477.47	2479.84	2466.35	2479.52	2482.32	2462.92	2472.93	2473.2	2468.13	2478.25	2476.44	88448.8	27919.7	21507.1	100189	35562.2	25780.2	82700.7	24488.1	19528.3	92948.9	30125	22912.6	77547.3	20732.4	17044.1	100189	35562.2	25780.2	82700.7
D31	GENG^FU YON	1	378569	2579.5	2578.34	2575.22	2578.33	2577.22	2575.9	2581.82	2579.2	2572.76	2578.16	2579.61	2575.37	2579.72	2577.27	2576.85	2578.33	2577.22	2575.9	2581.82	2579.2	2572.76	2578.16	2579.61	2575.37	2579.72	2577.27	2576.85	83714.3	27735.6	23005.4	76095.5	16829.6	14571.2	73705.3	14903.1	14732.3	117110	59564.2	44200.7	67172.2	17428.5	15585.5	76095.5	16829.6	14571.2	73705.3
D32	GENG YUE YING	1	372802	2431	2401.75	2382.63	2433.38	2414.24	2387.19	2431.23	2389.75	2376.9	2429.72	2402.67	2387.09	2429.66	2398.47	2377.3	2433.38	2414.24	2387.19	2431.23	2389.75	2376.9	2429.72	2402.67	2387.09	2429.66	2398.47	2377.3	668942	302671	176796	700649	475228	297783	656797	225585	153861	672844	296010	112999	644568	195707	127368	700649	475228	297783	656797
D33	GUO LI SHENG	1	322144	2279.53	2210.79	2173.89	2283.71	2228.6	2178.89	2276.06	2193.24	2132.78	2277.49	2214.14	2189.45	2280.82	2204.84	2194.82	2283.71	2228.6	2178.89	2276.06	2193.24	2132.78	2277.49	2214.14	2189.45	2280.82	2204.84	2194.82	687973	252813	213120	712610	299056	172616	675896	244097	265185	722878	303815	219847	638136	150124	193428	712610	299056	172616	675896
D34	GUO LI ZHU	1	12386948	1869.85	1892.36	1888.88	1867.35	1888.75	1885.03	1877.85	1905.75	1888.71	1862.52	1878.27	1881.92	1871.94	1898.69	1901.27	1867.35	1888.75	1885.03	1877.85	1905.75	1888.71	1862.52	1878.27	1881.92	1871.94	1898.69	1901.27	956405	472188	361572	1.01959e+06	634635	441580	926810	424358	326358	984856	469901	356066	889482	338686	310540	1.01959e+06	634635	441580	926810
D35	GUO WEN LAN	0	357443	2534.07	2523.4	2519.53	2540.26	2532.09	2526.93	2535.42	2523.58	2516.22	2529.93	2516.63	2516.26	2530.59	2520.7	2517.2	2540.26	2532.09	2526.93	2535.42	2523.58	2516.22	2529.93	2516.63	2516.26	2530.59	2520.7	2517.2	94904.9	24453.6	21196	102266	21568.4	22396.1	94838.1	14537.8	12621.8	114516	35595	20402.6	67350.8	25234.3	29003	102266	21568.4	22396.1	94838.1
D36	HE LIAN FEN	1	355810	1982.04	1853.71	1706.59	1984.17	1882.87	1743.07	1981.98	1839.52	1700.92	1987.15	1881.93	1719.3	1974.51	1795.21	1627	1984.17	1882.87	1743.07	1981.98	1839.52	1700.92	1987.15	1881.93	1719.3	1974.51	1795.21	1627	1.20118e+06	590760	351415	1.23546e+06	668224	278371	1.17825e+06	567791	367130	1.23862e+06	682359	402647	1.14912e+06	411015	363449	1.23546e+06	668224	278371	1.17825e+06
D37	HE XIANG AI	0	1044840	1392.8	1361.85	1318.68	1387.42	1342.8	1268.37	1382.06	1332.47	1305.99	1399.23	1392.35	1398.07	1402.37	1377	1291.44	1387.42	1342.8	1268.37	1382.06	1332.47	1305.99	1399.23	1392.35	1398.07	1402.37	1377	1291.44	1.15133e+06	737840	573287	1.16278e+06	723435	476055	1.10359e+06	585162	510104	1.20329e+06	913061	799809	1.13345e+06	705537	479384	1.16278e+06	723435	476055	1.10359e+06
D38	HU LI JUN	1	319851	2278.06	2191.01	2183.63	2277.16	2148.34	2132.55	2261.9	2175.33	2300.64	2282.09	2222.35	2192.22	2290.23	2214.04	2179.79	2277.16	2148.34	2132.55	2261.9	2175.33	2300.64	2282.09	2222.35	2192.22	2290.23	2214.04	2179.79	440802	161185	126404	452465	148227	113308	380055	120884	122927	463537	175331	146835	464333	190683	119801	452465	148227	113308	380055
D39	HUANG LIAN FENG	0	1112725	2040.84	2016.05	1952.22	2051.76	2049.22	2003.89	2048.68	2004.98	1909.43	2025.52	1990.06	1938.04	2037.83	2021.18	1949.17	2051.76	2049.22	2003.89	2048.68	2004.98	1909.43	2025.52	1990.06	1938.04	2037.83	2021.18	1949.17	722313	312520	211611	713699	194369	129589	664266	179233	209143	798228	535736	313395	704747	267057	144131	713699	194369	129589	664266
D40	HUANG ZE YUAN	1	394317	1986.81	1997.92	1938.04	1980.1	1994.01	1915.09	1985.66	1969.25	1860.61	1982.43	2022.79	2024.59	1999.39	2000.26	1915.43	1980.1	1994.01	1915.09	1985.66	1969.25	1860.61	1982.43	2022.79	2024.59	1999.39	2000.26	1915.43	1.08963e+06	550119	467921	1.15444e+06	634231	445516	1.04577e+06	497933	481064	1.15749e+06	584176	460857	989326	462961	479718	1.15444e+06	634231	445516	1.04577e+06
D41	JIN JIAN GUO	0	1172664	2522.76	2519.71	2508.67	2522.06	2516.28	2503.29	2521.49	2511.36	2496.35	2522.07	2527.26	2523.97	2525.44	2522.45	2504.27	2522.06	2516.28	2503.29	2521.49	2511.36	2496.35	2522.07	2527.26	2523.97	2525.44	2522.45	2504.27	154087	48578.2	41654.5	149465	47625.2	46703.2	188817	79890.5	53327.9	180995	40529.8	30291.8	96140.3	29376.4	40788.3	149465	47625.2	46703.2	188817
D42	JIN WEN BO	0	351621	2264.59	2231.15	2202.13	2267.75	2249.05	2221.83	2261.3	2203.43	2163.74	2263.24	2232.06	2208.93	2266.02	2238.27	2209.11	2267.75	2249.05	2221.83	2261.3	2203.43	2163.74	2263.24	2232.06	2208.93	2266.02	2238.27	2209.11	2.05664e+06	1.25654e+06	709432	2.09631e+06	1.513e+06	1.11777e+06	2.07909e+06	1.2707e+06	605192	2.12641e+06	1.34591e+06	739694	1.92142e+06	859171	294006	2.09631e+06	1.513e+06	1.11777e+06	2.07909e+06
D43	LI BO	0	1101691	1812.46	1817.68	1739.01	1806.73	1828.26	1762.08	1822.97	1809.6	1681.21	1804.55	1817.55	1779.7	1816.02	1813.85	1706.89	1806.73	1828.26	1762.08	1822.97	1809.6	1681.21	1804.55	1817.55	1779.7	1816.02	1813.85	1706.89	767630	352524	269546	801551	368497	239067	707176	243886	241694	815070	464606	358837	739348	301006	213782	801551	368497	239067	707176
D44	LI DE LAI	1	1173360	2445.08	2455.1	2455.91	2442.4	2453.02	2455.32	2445.82	2454.91	2453.5	2445.07	2456.09	2458.36	2447.04	2456.36	2456.21	2442.4	2453.02	2455.32	2445.82	2454.91	2453.5	2445.07	2456.09	2458.36	2447.04	2456.36	2456.21	111990	39362.3	25306.5	122945	50610.6	29740.4	92335.4	26426.5	18801.8	122464	44261.2	27839.3	109827	35354.7	24208.1	122945	50610.6	29740.4	92335.4
D45	LI FENG JIN	1	1027768	2075.43	2006.7	1944.32	2075.55	2026.14	1961.03	2062.39	1943.65	1899.04	2078.57	2033.3	1948.13	2085.1	2018.46	1963.84	2075.55	2026.14	1961.03	2062.39	1943.65	1899.04	2078.57	2033.3	1948.13	2085.1	2018.46	1963.84	1.05376e+06	469912	251250	1.06348e+06	481358	165069	1.02634e+06	305246	250479	1.09732e+06	619494	243715	1.02578e+06	465227	354893	1.06348e+06	481358	165069	1.02634e+06
D46	LI GUI ZHEN	0	1169256	2163.93	2062.63	1990.54	2163.64	2045.88	1992.94	2184.31	2108.43	1988.45	2165.05	2108.1	2033.48	2142.16	1971.51	1915.95	2163.64	2045.88	1992.94	2184.31	2108.43	1988.45	2165.05	2108.1	2033.48	2142.16	1971.51	1915.95	1.36827e+06	519528	347517	1.45764e+06	667176	522164	1.36338e+06	467013	256929	1.42954e+06	547086	287570	1.21214e+06	354852	302151	1.45764e+06	667176	522164	1.36338e+06
D47	LI GUO DONG	0	369553	2389.37	2404.95	2410.09	2387.28	2403.18	2410.99	2391.35	2406.87	2410.77	2387.22	2401.44	2404.63	2391.75	2409.16	2415.8	2387.28	2403.18	2410.99	2391.35	2406.87	2410.77	2387.22	2401.44	2404.63	2391.75	2409.16	2415.8	92219.8	46115.6	34550.2	96884.2	45517.4	32210.6	86418.1	39197.2	38519.6	101874	52992.1	32383.5	83137.7	45884.4	36559.4	96884.2	45517.4	32210.6	86418.1
D48	LI GUO PING	1	354148	2561.14	2561.58	2567.6	2559.69	2560.49	2565.25	2561.29	2563.9	2575.35	2561.64	2560.06	2564.51	2561.96	2562.18	2566.53	2559.69	2560.49	2565.25	2561.29	2563.9	2575.35	2561.64	2560.06	2564.51	2561.96	2562.18	2566.53	70257.7	28513.4	20992.8	101230	52189	31282.9	62036.9	23385.2	20595.4	67310	19364.3	13401.6	49546.3	17115.8	17769.6	101230	52189	31282.9	62036.9
D49	LI XUE MING	1	1136309	2283.47	2230.82	2188.28	2274.76	2204.56	2189.2	2277.72	2195.7	2117.74	2287.05	2262.07	2233.86	2294.23	2255.89	2189.83	2274.76	2204.56	2189.2	2277.72	2195.7	2117.74	2287.05	2262.07	2233.86	2294.23	2255.89	2189.83	953873	249433	155897	1.03501e+06	272941	84257.5	881600	176285	150378	1.05627e+06	378998	279707	834349	148152	94033.2	1.03501e+06	272941	84257.5	881600
D50	LI YONG LI	1	1334529	2157.67	2163.65	2128.54	2157.74	2167.39	2144.92	2159.12	2187.15	2159.19	2148.92	2154.23	2127.68	2165.14	2146	2077.52	2157.74	2167.39	2144.92	2159.12	2187.15	2159.19	2148.92	2154.23	2127.68	2165.14	2146	2077.52	834228	336539	251199	822327	279896	169334	825850	264698	145148	952487	593499	454658	727007	161462	184610	822327	279896	169334	825850
D51	LI YU SHAN	1	323641	1387.95	1326.05	1262.78	1386.94	1326.53	1271.12	1387.11	1319.01	1262.34	1391.77	1347.41	1311.24	1385.87	1307.95	1186.71	1386.94	1326.53	1271.12	1387.11	1319.01	1262.34	1391.77	1347.41	1311.24	1385.87	1307.95	1186.71	1.35485e+06	823744	555632	1.3776e+06	851887	481826	1.3396e+06	800609	563367	1.39174e+06	981886	706573	1.30834e+06	622368	429330	1.3776e+06	851887	481826	1.3396e+06
D52	LI ZHONG FANG	0	1092569	2233.85	2164.35	2078.97	2230.63	2133.4	2041.5	2228.8	2116.4	2086.18	2230.45	2192.32	2144.33	2245.65	2205.59	2011.48	2230.63	2133.4	2041.5	2228.8	2116.4	2086.18	2230.45	2192.32	2144.33	2245.65	2205.59	2011.48	790941	157242	146497	857468	194800	175247	603592	115748	79772.2	911631	186338	111627	772719	110553	194407	857468	194800	175247	603592
D53	LI ZI XIA	0	318128	1604.99	1495.75	1333.59	1615.48	1541.07	1440	1592.67	1481.54	1292.4	1600.2	1497.31	1360.4	1611.69	1454.59	1160.11	1615.48	1541.07	1440	1592.67	1481.54	1292.4	1600.2	1497.31	1360.4	1611.69	1454.59	1160.11	588071	352906	302817	592752	333955	336861	575201	346245	295169	629121	389473	290539	551094	324852	252499	592752	333955	336861	575201
D54	LIN SHU FEN	1	1155635	2672.33	2667.17	2663.49	2673.75	2666.4	2668.72	2676.74	2665.32	2646.76	2670.97	2661.47	2659.83	2667.82	2676.03	2678.59	2673.75	2666.4	2668.72	2676.74	2665.32	2646.76	2670.97	2661.47	2659.83	2667.82	2676.03	2678.59	367886	139376	80929.8	392104	157573	94280.4	393512	161336	85647.5	375181	131636	76060.3	309670	105462	64944.5	392104	157573	94280.4	393512
D55	LIN YAN CHEN	1	322017	2164.99	2165.91	2138.33	2156.51	2153.41	2138.61	2169.41	2161.27	2113.25	2167.7	2177.57	2146.19	2166.56	2172.5	2154.14	2156.51	2153.41	2138.61	2169.41	2161.27	2113.25	2167.7	2177.57	2146.19	2166.56	2172.5	2154.14	575468	214595	123880	622824	319568	185683	542145	170013	94214.9	583754	209441	105547	549724	135675	89933.5	622824	319568	185683	542145
D56	LIU CHENG RU	0	389581	2553.98	2558.24	2558.16	2553.85	2559.48	2551.65	2556.41	2556	2561.49	2551.45	2560.57	2563.19	2554.34	2556.14	2556.98	2553.85	2559.48	2551.65	2556.41	2556	2561.49	2551.45	2560.57	2563.19	2554.34	2556.14	2556.98	2396.08	1183.15	1123.87	2399.35	1128.9	1262.21	1949.19	1036.65	931.005	3498.52	1301.5	921.748	1679.05	1242.57	1371.72	2399.35	1128.9	1262.21	1949.19
D57	LIU FENG MIN	0	1136107	2522.7	2527.87	2529.45	2522.03	2527.68	2529.45	2523.74	2523.14	2517.91	2521.13	2529.08	2530.62	2523.95	2531.38	2538.69	2522.03	2527.68	2529.45	2523.74	2523.14	2517.91	2521.13	2529.08	2530.62	2523.95	2531.38	2538.69	23065.7	8423.12	7059.8	26957.3	6748.67	6426.63	20999.2	6729.1	4597.2	23686.1	13124.8	7476.9	20477.9	6840.48	9705.37	26957.3	6748.67	6426.63	20999.2
D58	LIU HAI YANG	0	365268	2336.28	2313.85	2291.86	2339.79	2329.53	2307.69	2335.34	2315.93	2287.21	2330.67	2307.58	2282.24	2339.45	2301.63	2290.97	2339.79	2329.53	2307.69	2335.34	2315.93	2287.21	2330.67	2307.58	2282.24	2339.45	2301.63	2290.97	683960	310045	182715	711227	447708	322395	686464	334364	173225	707512	298674	126950	628202	146629	100679	711227	447708	322395	686464
D59	LIU JIN XING	1	356043	2180.94	2160.58	2117.87	2182.89	2183.43	2169.04	2183.97	2162.19	2128	2178.95	2155.77	2110.86	2177.96	2138.06	2046.92	2182.89	2183.43	2169.04	2183.97	2162.19	2128	2178.95	2155.77	2110.86	2177.96	2138.06	2046.92	732925	391432	303166	757640	404426	314373	674092	281157	307316	761074	445334	344293	736486	421818	233739	757640	404426	314373	674092
D60	LIU RUI QING	0	1141051	2085.11	2099.82	2092.04	2082.09	2107.8	2112.1	2083.85	2086.45	2084.48	2083.57	2100.21	2086.22	2091.13	2105.36	2081.59	2082.09	2107.8	2112.1	2083.85	2086.45	2084.48	2083.57	2100.21	2086.22	2091.13	2105.36	2081.59	437231	235261	165953	458029	271823	189365	428376	229255	180738	452003	229417	158523	408518	204389	120957	458029	271823	189365	428376
D61	LIU SU RONG	1	352611	2520.3	2516.08	2505.88	2521.74	2523.57	2495.19	2515.24	2500.93	2529.81	2514.44	2530.79	2542.07	2529.95	2503.45	2441.46	2521.74	2523.57	2495.19	2515.24	2500.93	2529.81	2514.44	2530.79	2542.07	2529.95	2503.45	2441.46	66512.8	17373.6	22843.3	97989.3	18248.7	13818.9	52510.3	20106.8	35621.9	64893.6	15335.8	16588.1	48998.9	15823.9	33564.3	97989.3	18248.7	13818.9	52510.3
D62	LIU WANG	1	396416	2275.86	2268.35	2262.71	2274.32	2267.73	2253.41	2275.61	2259	2246.47	2276.22	2276.83	2279.48	2277.31	2269.19	2269.73	2274.32	2267.73	2253.41	2275.61	2259	2246.47	2276.22	2276.83	2279.48	2277.31	2269.19	2269.73	1.48067e+06	827410	534258	1.53819e+06	1.06051e+06	796098	1.44926e+06	735359	506430	1.50829e+06	805614	470771	1.42483e+06	691392	331483	1.53819e+06	1.06051e+06	796098	1.44926e+06
D63	LIU YAN XIANG	0	344561	2307.94	2306.99	2297.65	2309.64	2311.42	2300.39	2310.51	2305.03	2285.89	2302.41	2307.95	2299.48	2309.45	2302.33	2308.68	2309.64	2311.42	2300.39	2310.51	2305.03	2285.89	2302.41	2307.95	2299.48	2309.45	2302.33	2308.68	5208.27	2911.18	1753.15	3695.8	1688.96	1809.53	2697.3	1697.48	1947.06	10382	5687.44	1981.04	3732.46	1841.75	732.645	3695.8	1688.96	1809.53	2697.3
D64	LIU ZHEN HUAN	0	363361	2319.25	2338.26	2347.28	2318.2	2331.57	2331.18	2321.36	2338.39	2350.09	2316.57	2338.14	2354.74	2320.95	2345.88	2356.06	2318.2	2331.57	2331.18	2321.36	2338.39	2350.09	2316.57	2338.14	2354.74	2320.95	2345.88	2356.06	101646	62655.1	49979.3	106426	70246.4	62226.8	103107	65463	49366.9	104084	64726.9	42057.4	92711.3	48436.1	43503	106426	70246.4	62226.8	103107
D65	LIU ZHONG GE	0	358264	2302.77	2224.1	2149.89	2301.9	2242.01	2177.76	2296.46	2172.56	2167.68	2302.73	2227.2	2130.92	2309.83	2242.86	2123.77	2301.9	2242.01	2177.76	2296.46	2172.56	2167.68	2302.73	2227.2	2130.92	2309.83	2242.86	2123.77	710305	371973	267607	790153	406988	223627	644164	178674	132426	704607	403419	296048	696937	464642	369488	790153	406988	223627	644164
D66	LU LIN QING	0	374520	2479.31	2491.88	2496.26	2477.89	2488.98	2492.64	2479.89	2495.71	2511.2	2477.37	2491.92	2497.01	2482.18	2491.51	2487.14	2477.89	2488.98	2492.64	2479.89	2495.71	2511.2	2477.37	2491.92	2497.01	2482.18	2491.51	2487.14	9475.57	4286.55	2611.95	8434.43	2750.01	2200.81	9670.84	5140.21	2201.72	11939.3	5416.03	3326.15	7802.78	3955.51	2546.27	8434.43	2750.01	2200.81	9670.84
D67	LV CHUN HUI	0	1205024	2213.67	2188.68	2126.37	2210.3	2196.63	2165.87	2208.28	2166.26	2113.42	2216.98	2206.23	2149.6	2219.15	2182.4	2053	2210.3	2196.63	2165.87	2208.28	2166.26	2113.42	2216.98	2206.23	2149.6	2219.15	2182.4	2053	1.47875e+06	565807	332607	1.57555e+06	658173	405187	1.69201e+06	960410	561265	1.50279e+06	414766	166947	1.12724e+06	189222	192214	1.57555e+06	658173	405187	1.69201e+06
D68	LV FEN DI	0	321542	1974.99	1966.86	1921.36	1967.98	1971.89	1938.6	1971.65	1968.08	1943.09	1975.54	1978.33	1957.13	1985.01	1946.46	1826.19	1967.98	1971.89	1938.6	1971.65	1968.08	1943.09	1975.54	1978.33	1957.13	1985.01	1946.46	1826.19	786238	343134	243317	846168	448668	357194	795760	385456	291483	821798	311386	146962	673188	215365	176586	846168	448668	357194	795760
D69	MA FENG	0	325586	2279.83	2269.68	2222.77	2272.47	2290.73	2300.39	2283	2251.42	2119.12	2281.77	2263.09	2156.63	2282.5	2264.94	2210.93	2272.47	2290.73	2300.39	2283	2251.42	2119.12	2281.77	2263.09	2156.63	2282.5	2264.94	2210.93	105786	63312.6	72739.2	121584	95544.3	82129.7	118843	50512.7	54630.9	98062.2	54284	61286.2	83855	43688.5	77180	121584	95544.3	82129.7	118843
D70	MA WEN GUANG	1	1177039	1736.58	1646.3	1560.9	1741.77	1673.05	1604.28	1727.32	1593.74	1473.75	1737.09	1656.53	1574.6	1740	1658.44	1580.25	1741.77	1673.05	1604.28	1727.32	1593.74	1473.75	1737.09	1656.53	1574.6	1740	1658.44	1580.25	2.93254e+06	1.88432e+06	1.34783e+06	2.9921e+06	2.08099e+06	1.49709e+06	2.86972e+06	1.68493e+06	1.18612e+06	2.99365e+06	2.07149e+06	1.494e+06	2.87206e+06	1.66704e+06	1.17665e+06	2.9921e+06	2.08099e+06	1.49709e+06	2.86972e+06
D71	MA ZI YONG	0	1186932	2440.26	2445.11	2431.12	2439.23	2445.74	2433.85	2443.3	2437.82	2424.49	2436.34	2450.96	2434.64	2442.38	2444.44	2426.51	2439.23	2445.74	2433.85	2443.3	2437.82	2424.49	2436.34	2450.96	2434.64	2442.38	2444.44	2426.51	51537.2	15100.7	16574.4	38101.9	12436.4	17247.8	39852.9	15430.8	20283.9	96091.8	17876.2	15735.7	30604.7	14950.3	12835.2	38101.9	12436.4	17247.8	39852.9
D72	MU XUE ZHEN	0	1200040	2426.75	2409.96	2399.82	2425.09	2415.87	2405.64	2428.34	2407.64	2403.92	2427.61	2410.84	2393.12	2426	2404.71	2395.75	2425.09	2415.87	2405.64	2428.34	2407.64	2403.92	2427.61	2410.84	2393.12	2426	2404.71	2395.75	229130	75191	42625.3	243488	107622	44845.2	226629	63136.5	44344.8	234303	78222.4	46848.4	211544	47668.6	33520	243488	107622	44845.2	226629
D73	NIU JUN HUAN	0	1227044	2410.98	2411.41	2430.19	2408.41	2426.86	2482.87	2403.61	2400.36	2451.07	2406.78	2380.72	2274.78	2425.2	2432.43	2464.36	2408.41	2426.86	2482.87	2403.61	2400.36	2451.07	2406.78	2380.72	2274.78	2425.2	2432.43	2464.36	195952	78148.8	81899.4	209001	98121.1	97362	160097	98577.9	137780	241208	65192.8	70647.9	169756	46468.6	20232.9	209001	98121.1	97362	160097
D74	PAN YU BAO	1	1203903	2350.67	2321.98	2290.7	2353.77	2337.37	2316.22	2351.29	2317.67	2284.59	2348.92	2322.78	2291.2	2348.66	2309.04	2267.54	2353.77	2337.37	2316.22	2351.29	2317.67	2284.59	2348.92	2322.78	2291.2	2348.66	2309.04	2267.54	1.10267e+06	699246	437581	1.12825e+06	851295	636488	1.08862e+06	707494	507810	1.12157e+06	717184	378446	1.0715e+06	512091	214341	1.12825e+06	851295	636488	1.08862e+06
D75	PAN ZHI PING	1	364803	2087.06	2067.75	2010.6	2090.86	2088.75	2045.67	2083.68	2049.28	1973.77	2081.17	2062.22	2012.21	2092.66	2069.11	2000.12	2090.86	2088.75	2045.67	2083.68	2049.28	1973.77	2081.17	2062.22	2012.21	2092.66	2069.11	2000.12	590776	381205	338759	582632	336741	301591	587552	385953	325309	634893	480905	401187	555164	300450	309071	582632	336741	301591	587552
D76	QI YAN	0	1104084	2500.36	2498.58	2496.24	2500.05	2498.22	2496.83	2501.5	2500.97	2499.27	2500.71	2500.43	2497.64	2499.16	2494.61	2491.01	2500.05	2498.22	2496.83	2501.5	2500.97	2499.27	2500.71	2500.43	2497.64	2499.16	2494.61	2491.01	123894	51470.2	28541	135358	68781.5	44879.6	113724	43931.2	18961.6	127872	59097.6	27610.7	118398	32607.8	20932.4	135358	68781.5	44879.6	113724
D77	QIAO DONG XING	0	352337	2290.72	2259.22	2248.43	2291.22	2258.41	2232	2285.29	2241.24	2235.8	2291	2267.07	2258.57	2295.24	2267.68	2267	2291.22	2258.41	2232	2285.29	2241.24	2235.8	2291	2267.07	2258.57	2295.24	2267.68	2267	691615	427075	252905	719721	437983	213377	645973	315263	186336	697812	510724	362882	701062	426349	232596	719721	437983	213377	645973
D78	REN ZI XIN	0	367021	1540.06	1523.85	1508.64	1540.57	1542.99	1548.27	1544.45	1523.99	1556.56	1538.69	1519.05	1476	1536.58	1508.08	1460.31	1540.57	1542.99	1548.27	1544.45	1523.99	1556.56	1538.69	1519.05	1476	1536.58	1508.08	1460.31	1.21392e+06	845184	753916	1.2393e+06	868411	781523	1.15384e+06	780207	695095	1.2403e+06	850789	750160	1.21882e+06	873219	771227	1.2393e+06	868411	781523	1.15384e+06
D79	SHA WEN XUAN	0	1089532	1902.16	1930.6	1887.81	1892.58	1909.04	1867.3	1915.11	1922.83	1764.17	1900.68	1940.48	1936.96	1900.6	1949.67	1951.95	1892.58	1909.04	1867.3	1915.11	1922.83	1764.17	1900.68	1940.48	1936.96	1900.6	1949.67	1951.95	345656	150710	117851	344604	114275	98568.1	267532	67569.9	33962.9	402702	236934	198104	360857	162300	113139	344604	114275	98568.1	267532
D80	SHEN XIU SHENG	1	332586	2270.21	2156.2	2077.61	2276.5	2210.19	2119.91	2258.94	2084.06	1974	2271.76	2161.07	2095.32	2273.34	2157.42	2102.77	2276.5	2210.19	2119.91	2258.94	2084.06	1974	2271.76	2161.07	2095.32	2273.34	2157.42	2102.77	2.0791e+06	1.32548e+06	665887	2.10417e+06	1.55634e+06	877062	1.99972e+06	808836	260070	2.10283e+06	1.41433e+06	749871	2.10875e+06	1.49515e+06	714641	2.10417e+06	1.55634e+06	877062	1.99972e+06
D81	SHI TIE LIAN	0	340837	2111.39	2077.59	2022.05	2115.11	2099.19	2072.44	2113.28	2079.65	2027.7	2106.53	2072.68	2018.04	2110.69	2057.29	1961.35	2115.11	2099.19	2072.44	2113.28	2079.65	2027.7	2106.53	2072.68	2018.04	2110.69	2057.29	1961.35	719396	338820	279807	691067	235481	173963	680508	204311	169574	832851	587195	472967	667322	274397	221485	691067	235481	173963	680508
D82	SI DAO QUAN	0	325220	1962.88	1852.4	1772.62	1968.19	1875.75	1734.58	1964.13	1802.41	1656.7	1959.87	1897.67	1863.31	1959.28	1820.98	1792.81	1968.19	1875.75	1734.58	1964.13	1802.41	1656.7	1959.87	1897.67	1863.31	1959.28	1820.98	1792.81	1.68034e+06	699075	446591	1.71043e+06	838695	347650	1.62027e+06	475716	157229	1.77237e+06	849141	554302	1.61175e+06	593915	683701	1.71043e+06	838695	347650	1.62027e+06
D83	SI DE LI	1	388126	2460.1	2447.72	2429.73	2461.56	2451.96	2428.79	2460.75	2443.8	2430.13	2456.66	2451.49	2440.95	2461.46	2443.07	2417.35	2461.56	2451.96	2428.79	2460.75	2443.8	2430.13	2456.66	2451.49	2440.95	2461.46	2443.07	2417.35	603453	314449	151436	613041	358473	188164	594223	270741	118711	632429	380038	181681	573046	240390	108046	613041	358473	188164	594223
D84	SONG HUA FANG	0	323478	2307.99	2323.33	2318.69	2301.87	2320.87	2323.01	2315.89	2326.93	2308.91	2305.78	2315.95	2308.05	2308.64	2330.33	2334.39	2301.87	2320.87	2323.01	2315.89	2326.93	2308.91	2305.78	2315.95	2308.05	2308.64	2330.33	2334.39	334418	133704	95217.5	376458	174148	115119	285396	78126.9	67950.5	348012	156611	112610	324788	117094	77425.4	376458	174148	115119	285396
D85	SONG SHU QIU	0	378505	2250.59	2244.82	2217.28	2246.32	2257.35	2246.11	2252.64	2219.31	2158.57	2251.43	2246.76	2225.53	2252.05	2255.41	2236.44	2246.32	2257.35	2246.11	2252.64	2219.31	2158.57	2251.43	2246.76	2225.53	2252.05	2255.41	2236.44	240152	115624	88820.5	261226	149069	172013	233039	97946	50707.1	246747	102116	58129.4	218140	112283	71962.7	261226	149069	172013	233039
D86	SU JIAN GUO	1	1201539	2566.03	2570.95	2571.26	2564.24	2568.84	2569.79	2566.76	2572.58	2573.61	2566.35	2571.31	2572.81	2566.77	2571.21	2568.67	2564.24	2568.84	2569.79	2566.76	2572.58	2573.61	2566.35	2571.31	2572.81	2566.77	2571.21	2568.67	3998.5	960.056	937.264	3097.19	1306.73	1340.21	4977.79	548.064	112.559	6242.43	945.218	1047.42	1639.13	1007.23	1144.47	3097.19	1306.73	1340.21	4977.79
D87	SU MEI XIN	0	353069	1962.32	1953.72	1939.27	1959.28	1942.05	1910.13	1964.59	1953.63	1927.41	1961.14	1966.93	1973.73	1964.36	1951.32	1939.87	1959.28	1942.05	1910.13	1964.59	1953.63	1927.41	1961.14	1966.93	1973.73	1964.36	1951.32	1939.87	825592	490445	410657	850329	479125	395854	801437	426867	336545	865452	572537	505838	782061	470525	379332	850329	479125	395854	801437
D88	SUN BAO GUO	1	331331	2199.64	2234.28	2247.33	2193.8	2223.25	2220.34	2204.93	2231.86	2230.6	2195.06	2234.91	2260.25	2205.03	2248.14	2280.19	2193.8	2223.25	2220.34	2204.93	2231.86	2230.6	2195.06	2234.91	2260.25	2205.03	2248.14	2280.19	558274	237313	175600	585647	227410	172029	521482	174073	162631	611620	314588	199934	509928	223392	162522	585647	227410	172029	521482
D89	SUN FU MING	1	310312	2248.63	2236.22	2212.75	2251.09	2251.81	2246.3	2250.45	2218.94	2210.07	2245.12	2235.05	2203.16	2248.03	2232.21	2191.17	2251.09	2251.81	2246.3	2250.45	2218.94	2210.07	2245.12	2235.05	2203.16	2248.03	2232.21	2191.17	497.443	325.552	283.271	492.556	361.574	358.677	413.295	306.332	134.057	609.958	291.939	172.044	462.364	342.146	415.24	492.556	361.574	358.677	413.295
D90	TAN GONG XUAN	0	348687	1879.57	1835.49	1759.95	1875.67	1843.37	1765.48	1881.63	1815.66	1702.48	1880.77	1859.14	1799.62	1880.29	1819.01	1764.56	1875.67	1843.37	1765.48	1881.63	1815.66	1702.48	1880.77	1859.14	1799.62	1880.29	1819.01	1764.56	745364	453189	253495	757488	507061	292806	720189	371778	175640	768079	501747	262379	734144	420668	284824	757488	507061	292806	720189
D91	TANG SHAO GONG	0	340142	1937.78	1792.47	1675.67	1949.02	1863.09	1780.69	1929.57	1749.64	1631.28	1936.15	1781.34	1652.67	1935.98	1763.98	1594.85	1949.02	1863.09	1780.69	1929.57	1749.64	1631.28	1936.15	1781.34	1652.67	1935.98	1763.98	1594.85	2.55056e+06	1.57802e+06	923708	2.62661e+06	2.08015e+06	1.5777e+06	2.48955e+06	1.18357e+06	414988	2.54478e+06	1.51584e+06	766213	2.53921e+06	1.4722e+06	736214	2.62661e+06	2.08015e+06	1.5777e+06	2.48955e+06
D92	TIAN XUE DONG	0	366012	1280.8	1235.19	1171.55	1286.03	1241.07	1142.93	1287.33	1221.33	1173.36	1274.45	1263.48	1224.3	1275.61	1210.54	1135.59	1286.03	1241.07	1142.93	1287.33	1221.33	1173.36	1274.45	1263.48	1224.3	1275.61	1210.54	1135.59	460659	236090	188935	466737	217373	158934	433481	211878	218335	496746	289066	190193	443528	218619	189817	466737	217373	158934	433481
D93	WANG CHUN	1	342901	2241.23	2224.97	2213.25	2242.95	2231.36	2217.86	2238.58	2209.87	2189.85	2240.57	2228.32	2220.77	2242.8	2229.75	2223.2	2242.95	2231.36	2217.86	2238.58	2209.87	2189.85	2240.57	2228.32	2220.77	2242.8	2229.75	2223.2	1.10066e+06	712531	519754	1.12849e+06	800698	590667	1.06951e+06	618152	456144	1.12546e+06	785191	606815	1.07825e+06	635522	404299	1.12849e+06	800698	590667	1.06951e+06
D94	WANG DE JUN	1	507575	2286.75	2228.47	2187.16	2293.65	2267.96	2234.62	2286.68	2202.39	2151.78	2284.55	2220.95	2164.8	2282.04	2218.98	2190.07	2293.65	2267.96	2234.62	2286.68	2202.39	2151.78	2284.55	2220.95	2164.8	2282.04	2218.98	2190.07	1.59074e+06	645893	319316	1.65238e+06	947007	527976	1.49118e+06	368143	201864	1.66122e+06	655759	266981	1.55469e+06	587322	253361	1.65238e+06	947007	527976	1.49118e+06
D95	WANG GUANG SHENG	1	341013	2164.32	2030.1	1943.61	2171.49	2093.42	1995.65	2166.52	2003.91	1894.36	2163.83	2026.98	1923.37	2155.01	1979.74	1942.04	2171.49	2093.42	1995.65	2166.52	2003.91	1894.36	2163.83	2026.98	1923.37	2155.01	1979.74	1942.04	1.81721e+06	935887	436869	1.84499e+06	1.24582e+06	658447	1.83218e+06	862223	374901	1.84385e+06	1.01161e+06	342526	1.74544e+06	547815	256086	1.84499e+06	1.24582e+06	658447	1.83218e+06
D96	WANG GUANG YI	1	1182360	2324.2	2339.61	2329.89	2323.54	2346.68	2342.9	2327.82	2350.11	2343.65	2315.1	2322.85	2316.54	2330.54	2339.86	2316.48	2323.54	2346.68	2342.9	2327.82	2350.11	2343.65	2315.1	2322.85	2316.54	2330.54	2339.86	2316.48	293280	102166	83899	305789	93926.3	67490.8	273829	73489.3	57716.1	335848	173955	140955	254601	55497	56657.8	305789	93926.3	67490.8	273829
D97	WANG HAI GANG	0	330685	1872.17	1865.18	1866.2	1866.59	1859.17	1860.94	1867.21	1837.03	1826.96	1876.44	1875.47	1878.07	1878.35	1887.03	1892.93	1866.59	1859.17	1860.94	1867.21	1837.03	1826.96	1876.44	1875.47	1878.07	1878.35	1887.03	1892.93	802247	445480	334354	836069	535973	381529	750215	395548	304457	814658	443672	382785	806181	396675	247794	836069	535973	381529	750215
D98	WANG HUAI YOU	1	377592	1953.97	1902.94	1851.35	1956.13	1908.45	1855.28	1959.7	1920.98	1890.89	1955.23	1913.32	1877.3	1944.62	1865.44	1766.31	1956.13	1908.45	1855.28	1959.7	1920.98	1890.89	1955.23	1913.32	1877.3	1944.62	1865.44	1766.31	2.1464e+06	1.47314e+06	1.1315e+06	2.17516e+06	1.59114e+06	1.26876e+06	2.15533e+06	1.45628e+06	1.15308e+06	2.20628e+06	1.58528e+06	1.15453e+06	2.04619e+06	1.23302e+06	904482	2.17516e+06	1.59114e+06	1.26876e+06	2.15533e+06
D99	WANG JIN YOU	1	342395	2103.46	2104.21	2086.38	2099.88	2104.97	2091.91	2101.39	2091.4	2073.57	2103.34	2111.32	2094.22	2109.3	2108.72	2084.1	2099.88	2104.97	2091.91	2101.39	2091.4	2073.57	2103.34	2111.32	2094.22	2109.3	2108.72	2084.1	658069	347437	252277	675066	389278	228607	638674	299641	237107	678967	383425	286967	638326	311097	256218	675066	389278	228607	638674
D100	WANG JIN YUE	0	1292488	2269.96	2266.72	2250.87	2267.23	2273.78	2263.94	2269.58	2258.33	2240.82	2265.46	2262.48	2246.42	2277.71	2272.18	2251.24	2267.23	2273.78	2263.94	2269.58	2258.33	2240.82	2265.46	2262.48	2246.42	2277.71	2272.18	2251.24	562015	238993	169816	604617	320994	240463	537784	182985	134084	588428	244691	160985	514158	200096	135877	604617	320994	240463	537784
D101	WANG KE SONG	0	1287366	1738.92	1652.92	1575.72	1746.18	1684.74	1615.54	1732.33	1610.84	1507.31	1738.42	1659.56	1587.6	1738.6	1653.12	1583.05	1746.18	1684.74	1615.54	1732.33	1610.84	1507.31	1738.42	1659.56	1587.6	1738.6	1653.12	1583.05	2.41431e+06	1.66708e+06	1.12596e+06	2.46293e+06	1.89798e+06	1.4111e+06	2.38116e+06	1.50836e+06	934068	2.43685e+06	1.77601e+06	1.23924e+06	2.37473e+06	1.4531e+06	848648	2.46293e+06	1.89798e+06	1.4111e+06	2.38116e+06
D102	WANG LI YE	0	380871	1649.72	1675.68	1628.42	1634.96	1671.23	1670.83	1650.94	1676.22	1638.75	1647.33	1677.68	1623.25	1666.52	1678.53	1543.6	1634.96	1671.23	1670.83	1650.94	1676.22	1638.75	1647.33	1677.68	1623.25	1666.52	1678.53	1543.6	589628	301765	235162	648812	403591	310978	576166	260356	188019	594654	258843	237574	529343	254789	165586	648812	403591	310978	576166
D103	WANG QI JIANG	0	1063067	1912.15	1890.82	1870.81	1906.75	1889.03	1871.54	1907.67	1884.93	1882.22	1916.78	1904.63	1894.77	1917.3	1882.13	1825.98	1906.75	1889.03	1871.54	1907.67	1884.93	1882.22	1916.78	1904.63	1894.77	1917.3	1882.13	1825.98	657225	252616	220060	686073	224756	158425	615047	197614	352706	709954	339192	171190	613256	233411	239601	686073	224756	158425	615047
D104	WANG RU TIE	1	368555	2312.87	2329.47	2323	2310.41	2331.21	2328.12	2315.3	2327.86	2316.79	2310.16	2328.09	2324.55	2315.69	2330.71	2321.5	2310.41	2331.21	2328.12	2315.3	2327.86	2316.79	2310.16	2328.09	2324.55	2315.69	2330.71	2321.5	293030	113486	83059.3	316603	140780	97822.6	285729	102033	69795.9	306664	119210	82793.2	261899	88706.9	79689.7	316603	140780	97822.6	285729
D105	WANG SHAN XIU	0	345575	1581.02	1525.23	1481.6	1588.08	1553.62	1519.93	1577.42	1507.96	1447.52	1578.28	1517.7	1473.49	1580.21	1519.63	1479.26	1588.08	1553.62	1519.93	1577.42	1507.96	1447.52	1578.28	1517.7	1473.49	1580.21	1519.63	1479.26	1.61486e+06	1.09998e+06	772730	1.64328e+06	1.21227e+06	906807	1.58124e+06	984690	608281	1.64218e+06	1.20412e+06	894053	1.5915e+06	977360	639229	1.64328e+06	1.21227e+06	906807	1.58124e+06
D106	WANG SHU GENG	1	360366	1678.56	1579.23	1495.74	1683.44	1605.24	1532.89	1672.33	1530.99	1421.88	1682.64	1600.14	1521.27	1675.66	1576.28	1495.11	1683.44	1605.24	1532.89	1672.33	1530.99	1421.88	1682.64	1600.14	1521.27	1675.66	1576.28	1495.11	2.31875e+06	1.43136e+06	1.08584e+06	2.36135e+06	1.58183e+06	1.23297e+06	2.26454e+06	1.27343e+06	942754	2.40207e+06	1.60233e+06	1.13522e+06	2.24453e+06	1.24077e+06	1.00073e+06	2.36135e+06	1.58183e+06	1.23297e+06	2.26454e+06
D107	WANG SHU XIANG	1	271601	2613.63	2616.9	2621.36	2614.58	2617.02	2621.04	2613.48	2617.69	2622	2612.55	2614.37	2618.42	2613.93	2618.59	2624.21	2614.58	2617.02	2621.04	2613.48	2617.69	2622	2612.55	2614.37	2618.42	2613.93	2618.59	2624.21	85216.9	30770.9	23015.8	83262.4	20151.8	17971.2	82325.4	24418.1	17182.8	100854	58219.9	38727.9	74286.8	19676.9	17532.9	83262.4	20151.8	17971.2	82325.4
D108	WANG WEN YOU	1	316889	2238.04	2217.4	2195.89	2242.81	2238.34	2234.4	2240.15	2220.56	2206.63	2231.46	2201.52	2166.42	2237.72	2207.29	2167.64	2242.81	2238.34	2234.4	2240.15	2220.56	2206.63	2231.46	2201.52	2166.42	2237.72	2207.29	2167.64	879986	398651	266013	918280	420425	235799	814711	278379	221135	913000	466855	349315	871336	417138	245351	918280	420425	235799	814711
D109	WANG YU YING	0	357535	1819.89	1669.46	1572.75	1823.25	1683.81	1570.14	1798.48	1569.78	1564.46	1828.59	1699.66	1577	1828.57	1711.21	1577.32	1823.25	1683.81	1570.14	1798.48	1569.78	1564.46	1828.59	1699.66	1577	1828.57	1711.21	1577.32	1.00075e+06	486063	328839	1.03913e+06	515813	334972	906755	329190	325725	1.04629e+06	556995	329663	1.00784e+06	530569	323197	1.03913e+06	515813	334972	906755
D110	WANG ZE XING	0	393232	2481.76	2494.87	2498.62	2479.45	2494.93	2499.63	2485.82	2497.46	2499.88	2479.31	2492.03	2495.28	2482.56	2495.3	2500.1	2479.45	2494.93	2499.63	2485.82	2497.46	2499.88	2479.31	2492.03	2495.28	2482.56	2495.3	2500.1	47529.9	14053.1	10469.1	59013.3	17644.9	11662.2	31103.8	9381.08	11781.6	53065.9	12917.6	8815.64	46338.3	16047.6	9642.33	59013.3	17644.9	11662.2	31103.8
D111	WANG ZHAO RONG	0	389072	2221.27	2179.7	2132.13	2224.91	2204.63	2145.82	2223.91	2169.15	2129.96	2218.29	2186.48	2151.68	2218.07	2156.25	2095.71	2224.91	2204.63	2145.82	2223.91	2169.15	2129.96	2218.29	2186.48	2151.68	2218.07	2156.25	2095.71	1.14651e+06	430205	272001	1.19588e+06	615882	347147	1.07969e+06	283882	345704	1.1974e+06	471931	206329	1.10873e+06	330889	219282	1.19588e+06	615882	347147	1.07969e+06
D112	WANG ZHI XIA	0	339555	1868.92	1822.43	1768.23	1863.77	1827.54	1792.2	1862.09	1800.74	1745.67	1876.94	1849.65	1801.82	1872.93	1809.83	1722.14	1863.77	1827.54	1792.2	1862.09	1800.74	1745.67	1876.94	1849.65	1801.82	1872.93	1809.83	1722.14	1.23503e+06	580830	434372	1.29928e+06	793673	447458	1.25955e+06	647024	436008	1.24629e+06	439982	435423	1.12815e+06	394788	408967	1.29928e+06	793673	447458	1.25955e+06
D113	WEN CHUN LING	0	351153	1834.12	1785.53	1736.52	1836.38	1789.36	1742.1	1829.56	1772.44	1709.01	1836.27	1801.84	1777.97	1834.2	1776.8	1708.99	1836.38	1789.36	1742.1	1829.56	1772.44	1709.01	1836.27	1801.84	1777.97	1834.2	1776.8	1708.99	2.34668e+06	1.57025e+06	1.14801e+06	2.38856e+06	1.60385e+06	1.02872e+06	2.28171e+06	1.38408e+06	1.02209e+06	2.40411e+06	1.82161e+06	1.49085e+06	2.31012e+06	1.43521e+06	987267	2.38856e+06	1.60385e+06	1.02872e+06	2.28171e+06
D114	WEN SHU XIA	1	323575	2047.68	1950.97	1923.06	2045.34	1959.25	1934.62	2031.26	1911.9	1909.53	2057.67	1970.62	1901.53	2056.19	1957.61	1948.97	2045.34	1959.25	1934.62	2031.26	1911.9	1909.53	2057.67	1970.62	1901.53	2056.19	1957.61	1948.97	1.21724e+06	542080	380617	1.30167e+06	639553	427973	1.19963e+06	532915	345012	1.25011e+06	536973	401625	1.10978e+06	439104	317527	1.30167e+06	639553	427973	1.19963e+06
D115	WU HONG ZHI	0	387950	2516.42	2525.34	2531.46	2518.5	2524.66	2529.39	2516.29	2524.33	2528.9	2513.2	2523.34	2529.68	2517.72	2529.32	2538.71	2518.5	2524.66	2529.39	2516.29	2524.33	2528.9	2513.2	2523.34	2529.68	2517.72	2529.32	2538.71	126537	44370	28310.3	113140	35172.5	24560.8	124848	37173.1	26072.4	168586	62749.3	37122.9	98474.1	41258.3	24266.6	113140	35172.5	24560.8	124848
D116	WU LI CHUN	0	1335970	1977.08	1922.44	1861.89	1978.71	1953.24	1919.9	1974.17	1892.4	1818.6	1974.83	1920.55	1838.37	1980.6	1918.52	1852.58	1978.71	1953.24	1919.9	1974.17	1892.4	1818.6	1974.83	1920.55	1838.37	1980.6	1918.52	1852.58	1.10254e+06	437727	272628	1.15026e+06	502370	233849	1.07004e+06	394676	302963	1.14074e+06	529521	334319	1.04514e+06	305164	214389	1.15026e+06	502370	233849	1.07004e+06
D117	WU WEI DONG	0	1177957	2133.99	2130.91	2107.54	2132.35	2141.97	2137.43	2136.01	2114.07	2080.59	2132.7	2127.36	2091.17	2134.99	2137.87	2110.86	2132.35	2141.97	2137.43	2136.01	2114.07	2080.59	2132.7	2127.36	2091.17	2134.99	2137.87	2110.86	525141	285725	207388	555380	297304	198325	486575	215278	156942	544470	315154	227942	511927	307927	239622	555380	297304	198325	486575
D118	WU YU LING	1	331150	1814.04	1761.48	1660.18	1818.31	1774.92	1639.38	1807.01	1705.24	1595.14	1808.64	1789.09	1764.01	1822.31	1769.55	1592.13	1818.31	1774.92	1639.38	1807.01	1705.24	1595.14	1808.64	1789.09	1764.01	1822.31	1769.55	1592.13	1.99201e+06	906094	688400	2.00871e+06	818398	600083	1.89422e+06	755144	576995	2.13869e+06	1.19388e+06	951594	1.91708e+06	787479	518531	2.00871e+06	818398	600083	1.89422e+06
D119	WU YU ZHUO	0	1198180	1849.94	1746.07	1674.2	1858.22	1782.08	1719.29	1840.85	1705.52	1627.64	1849.97	1747.9	1681.12	1850.58	1745.47	1659.5	1858.22	1782.08	1719.29	1840.85	1705.52	1627.64	1849.97	1747.9	1681.12	1850.58	1745.47	1659.5	3.04477e+06	1.79413e+06	1.38688e+06	3.16675e+06	2.19126e+06	1.71262e+06	3.04498e+06	1.77049e+06	1.39557e+06	3.09929e+06	1.77553e+06	1.29793e+06	2.86265e+06	1.37934e+06	1.05825e+06	3.16675e+06	2.19126e+06	1.71262e+06	3.04498e+06
D120	XIA XIU JUAN	0	379439	2313.63	2302.86	2283.8	2308.76	2294.29	2279.68	2312.59	2288.99	2246.76	2314.28	2310.17	2293.32	2318.97	2317.94	2313.37	2308.76	2294.29	2279.68	2312.59	2288.99	2246.76	2314.28	2310.17	2293.32	2318.97	2317.94	2313.37	650421	268211	162917	690200	338283	191350	626541	229785	145182	672916	311021	176053	609688	180892	130592	690200	338283	191350	626541
D121	XIAO JIN LIANG	1	384385	2217.54	2231.32	2226.61	2218.04	2234.01	2222	2222.46	2235.68	2227.76	2209.95	2224.64	2227.31	2219.94	2231.7	2229.85	2218.04	2234.01	2222	2222.46	2235.68	2227.76	2209.95	2224.64	2227.31	2219.94	2231.7	2229.85	307708	120669	102034	321485	152203	120445	273036	96660.2	95636.7	333911	134158	111652	300027	93847.8	73967.5	321485	152203	120445	273036
D122	XING FU RONG	1	321652	2266.85	2151.46	2145.03	2268.39	2156.06	2096.89	2256.54	2104.62	2131.76	2275.96	2178.94	2149.86	2266.13	2160.89	2213.6	2268.39	2156.06	2096.89	2256.54	2104.62	2131.76	2275.96	2178.94	2149.86	2266.13	2160.89	2213.6	1.21919e+06	510283	284290	1.26652e+06	607955	283205	1.16753e+06	367601	143510	1.25783e+06	588988	423595	1.18167e+06	455150	244975	1.26652e+06	607955	283205	1.16753e+06
D123	XU AI ZHEN	0	388327	2311.03	2312.72	2302.12	2310.05	2320.16	2305.49	2312.16	2288.33	2243.59	2309.06	2312.93	2296.16	2312.97	2325.63	2354.52	2310.05	2320.16	2305.49	2312.16	2288.33	2243.59	2309.06	2312.93	2296.16	2312.97	2325.63	2354.52	105694	69660.6	66106.4	111393	58884.6	49839.6	106322	77900.7	92735.8	116724	84763	85039.4	87695.3	55426.9	29456.7	111393	58884.6	49839.6	106322
D124	XU DENG KE	1	317531	2519.65	2529.95	2533.94	2518.01	2529.6	2532.04	2518.88	2522.35	2508.29	2519.06	2529.49	2535.61	2522.71	2538.72	2560.33	2518.01	2529.6	2532.04	2518.88	2522.35	2508.29	2519.06	2529.49	2535.61	2522.71	2538.72	2560.33	280011	107053	85587.3	300323	124154	82457.6	263998	105688	76589.6	302908	110072	80896.8	251421	84701.6	103450	300323	124154	82457.6	263998
D125	XU QIANG	0	389390	2405.86	2411.35	2424.38	2404.21	2408.93	2417.09	2407.08	2413.81	2438.5	2405.55	2409.05	2416.56	2406.62	2413.92	2427.22	2404.21	2408.93	2417.09	2407.08	2413.81	2438.5	2405.55	2409.05	2416.56	2406.62	2413.92	2427.22	978297	762561	548078	997855	823909	652250	956033	643008	290564	989996	789370	612646	968623	786603	607009	997855	823909	652250	956033
D126	XU YU MIN	1	309283	1961.76	1921.46	1828.12	1964.22	1949	1887.35	1960.42	1905.59	1791.75	1957.51	1920.97	1839.93	1964.99	1905.17	1762.69	1964.22	1949	1887.35	1960.42	1905.59	1791.75	1957.51	1920.97	1839.93	1964.99	1905.17	1762.69	748843	446315	360834	770738	442658	355749	738912	430118	300799	779202	534819	458152	703175	355436	297580	770738	442658	355749	738912
D127	YAN ZI YOU	0	384162	2324.29	2313.88	2299.36	2324.44	2314.97	2304.87	2323.51	2316.33	2313.24	2323.65	2318.29	2304.74	2325.58	2305.42	2272.87	2324.44	2314.97	2304.87	2323.51	2316.33	2313.24	2323.65	2318.29	2304.74	2325.58	2305.42	2272.87	719529	297555	194562	763858	344728	212037	692154	261274	194545	775015	353715	191550	643877	218321	177088	763858	344728	212037	692154
D128	YANG BAO LI	0	372492	2519.52	2554.16	2591.17	2516	2532.18	2545.73	2518.56	2561.14	2625.97	2518.65	2561.21	2605.51	2524.98	2563.97	2597.84	2516	2532.18	2545.73	2518.56	2561.14	2625.97	2518.65	2561.21	2605.51	2524.98	2563.97	2597.84	102186	29410.4	23279.9	93718.4	19643.7	21144.4	106714	40683.1	32279.7	121852	34362	21331.9	85957	24342.2	21125	93718.4	19643.7	21144.4	106714
D129	YANG HE	0	387735	2163.14	2105.88	2050.85	2167.35	2140.55	2091.16	2160.43	2092.14	2048	2160.87	2104.95	2049.43	2163.87	2082.93	2008.15	2167.35	2140.55	2091.16	2160.43	2092.14	2048	2160.87	2104.95	2049.43	2163.87	2082.93	2008.15	1.42377e+06	836050	461414	1.46342e+06	1.17621e+06	959344	1.3859e+06	664839	289476	1.43151e+06	776938	296175	1.41321e+06	707791	246162	1.46342e+06	1.17621e+06	959344	1.3859e+06
D130	YANG HONG LI	1	365037	2284.09	2235.67	2201.73	2286.71	2248.21	2215.22	2282.9	2222.94	2153.93	2286.27	2247.71	2209.54	2280.33	2219.55	2205.8	2286.71	2248.21	2215.22	2282.9	2222.94	2153.93	2286.27	2247.71	2209.54	2280.33	2219.55	2205.8	972606	504747	352018	1.00058e+06	552513	252122	966380	547727	442357	990032	629726	480063	932293	286171	285297	1.00058e+06	552513	252122	966380
D131	YU GUI LAN	0	314152	2115.96	2089.89	2025.85	2121.66	2111.45	2059.34	2122.85	2083.2	2007.43	2102.22	2091.69	2048.35	2118.2	2068.99	1925.93	2121.66	2111.45	2059.34	2122.85	2083.2	2007.43	2102.22	2091.69	2048.35	2118.2	2068.99	1925.93	409908	177708	159763	377962	87478	54089.9	328896	110197	85751.7	537562	316565	269746	375479	113997	53895.5	377962	87478	54089.9	328896
D132	YU QING YI	1	344329	1775.87	1687.91	1617.59	1782.16	1707.61	1643.42	1775.04	1679.15	1606.57	1778.37	1701.83	1639.2	1767.76	1660.81	1575.31	1782.16	1707.61	1643.42	1775.04	1679.15	1606.57	1778.37	1701.83	1639.2	1767.76	1660.81	1575.31	1.91906e+06	1.17511e+06	862102	1.97054e+06	1.29589e+06	960079	1.85889e+06	1.01601e+06	767285	1.9782e+06	1.29341e+06	933271	1.86616e+06	1.07439e+06	767386	1.97054e+06	1.29589e+06	960079	1.85889e+06
D133	YU WAN YI	0	381127	1720.69	1707.62	1666.95	1717.96	1717.57	1687.99	1722.63	1706.53	1671.35	1718.63	1709.26	1677	1723.64	1696.02	1624.82	1717.96	1717.57	1687.99	1722.63	1706.53	1671.35	1718.63	1709.26	1677	1723.64	1696.02	1624.82	1.02548e+06	541734	388007	1.0504e+06	627092	408331	992248	457588	415835	1.05376e+06	596812	395274	1.00303e+06	466443	328421	1.0504e+06	627092	408331	992248
D134	YUAN WEI	1	1258014	1693.9	1615.55	1494.44	1695.11	1646.92	1577.88	1694.27	1603.97	1452.57	1697.77	1632.48	1518.99	1688.38	1570.67	1379.76	1695.11	1646.92	1577.88	1694.27	1603.97	1452.57	1697.77	1632.48	1518.99	1688.38	1570.67	1379.76	1.42192e+06	848864	649069	1.47282e+06	958676	710811	1.33494e+06	637516	592372	1.44684e+06	940370	723728	1.42639e+06	805089	542612	1.47282e+06	958676	710811	1.33494e+06
D135	YUE SHI CHANG	0	361305	1396.93	1364.14	1315.78	1397.89	1378.65	1346.41	1386.76	1323.56	1231.57	1394.49	1373.55	1331.88	1409.08	1383.94	1378.94	1397.89	1378.65	1346.41	1386.76	1323.56	1231.57	1394.49	1373.55	1331.88	1409.08	1383.94	1378.94	971825	663650	568753	984994	609581	601381	988364	730000	569239	1.0083e+06	695622	542143	898310	581710	551931	984994	609581	601381	988364
D136	ZHAI SHU WANG	1	346730	1889.03	1923.6	1930.04	1885.4	1917.68	1934.1	1892.06	1932	1941.44	1887.52	1921.04	1932.76	1891.24	1924.24	1909.1	1885.4	1917.68	1934.1	1892.06	1932	1941.44	1887.52	1921.04	1932.76	1891.24	1924.24	1909.1	642630	308871	216268	686853	358226	219522	627199	357327	255703	663324	276249	200896	590275	235915	188240	686853	358226	219522	627199
D137	ZHANG BING JIE	1	357877	2073.88	2102.12	2099.41	2068	2090.36	2089.94	2077.25	2099.49	2079.62	2071.49	2102.68	2107.05	2078.91	2116.29	2118.2	2068	2090.36	2089.94	2077.25	2099.49	2079.62	2071.49	2102.68	2107.05	2078.91	2116.29	2118.2	504732	239642	169343	505932	198108	139623	490022	211325	117051	549594	341567	241849	471197	196545	164367	505932	198108	139623	490022
D138	ZHANG BING KUN	0	347080	2436.08	2411.85	2423.96	2440.29	2419.96	2423.74	2441.3	2431.88	2481.25	2428.85	2393.02	2384.48	2433.88	2402.08	2408.36	2440.29	2419.96	2423.74	2441.3	2431.88	2481.25	2428.85	2393.02	2384.48	2433.88	2402.08	2408.36	283970	94813.8	82340.3	329830	139324	78975.1	247446	37020.3	16527.4	305666	115865	91578.9	249565	73695.2	142972	329830	139324	78975.1	247446
D139	ZHANG CHANG ZHEN	0	358983	2151.65	2135.17	2108.5	2146.58	2134.54	2125.39	2150.34	2121.76	2096.89	2155.11	2151.66	2118.18	2154.66	2132.29	2088.94	2146.58	2134.54	2125.39	2150.34	2121.76	2096.89	2155.11	2151.66	2118.18	2154.66	2132.29	2088.94	617623	243123	170539	654920	311020	178821	582013	201088	166577	634822	245067	138068	596827	206518	199319	654920	311020	178821	582013
D140	ZHANG DA ZHUAN	0	380173	2181.89	2150.46	2077.48	2184.01	2168.23	2123.25	2170.66	2108.91	1995.51	2180.23	2154.64	2094.12	2192.58	2164	2061.27	2184.01	2168.23	2123.25	2170.66	2108.91	1995.51	2180.23	2154.64	2094.12	2192.58	2164	2061.27	590547	275806	265624	591864	229203	231485	605448	286238	313840	651970	335624	285384	506953	242890	224531	591864	229203	231485	605448
D141	ZHANG DE ZHEN	1	1094440	1853.07	1791.62	1726.77	1857.3	1820.34	1773.43	1846.61	1758.41	1672.41	1851.06	1785.14	1721.47	1857.26	1800.87	1733.88	1857.3	1820.34	1773.43	1846.61	1758.41	1672.41	1851.06	1785.14	1721.47	1857.26	1800.87	1733.88	1.70893e+06	1.10551e+06	813789	1.75826e+06	1.34235e+06	1.01406e+06	1.69783e+06	1.07322e+06	740008	1.72296e+06	1.10931e+06	804613	1.65449e+06	860594	661384	1.75826e+06	1.34235e+06	1.01406e+06	1.69783e+06
D142	ZHANG GUO JUN	0	371436	1941.08	1803.17	1688.74	1955.3	1865.3	1766.24	1941.6	1782.87	1671.66	1942.62	1810.74	1688.04	1924.52	1748.18	1615.81	1955.3	1865.3	1766.24	1941.6	1782.87	1671.66	1942.62	1810.74	1688.04	1924.52	1748.18	1615.81	3.40783e+06	2.25792e+06	1.38983e+06	3.48825e+06	2.64839e+06	1.82732e+06	3.38942e+06	2.10654e+06	1.20082e+06	3.45129e+06	2.41049e+06	1.53074e+06	3.30113e+06	1.84867e+06	949406	3.48825e+06	2.64839e+06	1.82732e+06	3.38942e+06
D143	ZHANG GUO MING	0	393069	2445.67	2430.02	2411.31	2448.89	2435.59	2391.51	2441.45	2407.17	2400.91	2437.77	2437.59	2435.26	2454.83	2437.5	2410.54	2448.89	2435.59	2391.51	2441.45	2407.17	2400.91	2437.77	2437.59	2435.26	2454.83	2437.5	2410.54	25845.2	10821.3	8998.7	24060.3	6356.9	7909.51	24894.2	10597.5	6379.17	37158.4	17982.6	13470.3	16300.4	6976.91	6212.17	24060.3	6356.9	7909.51	24894.2
D144	ZHANG HE CHUN	0	322911	2450.05	2431.24	2418.64	2452.41	2443.51	2427.39	2450.39	2428.58	2409.62	2447.87	2429.71	2416.4	2449.54	2422.3	2420.21	2452.41	2443.51	2427.39	2450.39	2428.58	2409.62	2447.87	2429.71	2416.4	2449.54	2422.3	2420.21	958752	630422	324821	980442	843842	644147	950242	558180	223761	960336	608799	242903	943572	496357	145809	980442	843842	644147	950242
D145	ZHANG JI PING	0	339394	2162.81	2127.62	2072.31	2160.59	2147.26	2092.44	2162.43	2107.82	2040.56	2159.32	2138.26	2093.11	2169.07	2113.62	2053.96	2160.59	2147.26	2092.44	2162.43	2107.82	2040.56	2159.32	2138.26	2093.11	2169.07	2113.62	2053.96	941688	353832	246970	1.00635e+06	421698	214680	938774	402939	356056	984520	381950	232581	829868	190991	179642	1.00635e+06	421698	214680	938774
D146	ZHANG LIAN JUN	1	387837	2368.46	2381.99	2375.99	2367.96	2393.57	2382.5	2373.58	2384.35	2382.09	2362.38	2376.88	2376.88	2370.08	2372.73	2360.79	2367.96	2393.57	2382.5	2373.58	2384.35	2382.09	2362.38	2376.88	2376.88	2370.08	2372.73	2360.79	160961	55296.6	46209.1	174198	84377.3	53546.4	143157	40924.9	49574.1	171454	47010	39871.7	154000	47601.8	42323.5	174198	84377.3	53546.4	143157
D147	ZHANG SHOU WEN	0	362454	1912.81	1882.13	1828.75	1915.2	1905.19	1865.18	1908.65	1864.66	1800.34	1910.83	1883.6	1840.21	1916.59	1872.43	1798.5	1915.2	1905.19	1865.18	1908.65	1864.66	1800.34	1910.83	1883.6	1840.21	1916.59	1872.43	1798.5	588726	357644	283102	604366	396846	301919	579032	353031	275312	612524	394736	299356	557262	274671	247284	604366	396846	301919	579032
D148	ZHANG SHU LAN	0	351048	2059.9	2093.24	2085.65	2054	2093.92	2102.2	2064.68	2097.88	2078.57	2055.09	2086.98	2092.38	2066	2094.62	2066.32	2054	2093.92	2102.2	2064.68	2097.88	2078.57	2055.09	2086.98	2092.38	2066	2094.62	2066.32	481275	273686	200439	495331	285281	197491	473597	263946	204589	511675	324442	243523	442171	214245	152731	495331	285281	197491	473597
D149	ZHANG WAN LI	0	323672	1938.56	1850.75	1776.37	1939.74	1865.93	1799.34	1928.33	1805.15	1707.23	1943.82	1867.92	1793.95	1942.21	1860.71	1796.1	1939.74	1865.93	1799.34	1928.33	1805.15	1707.23	1943.82	1867.92	1793.95	1942.21	1860.71	1796.1	3.06865e+06	2.0939e+06	1.52383e+06	3.1177e+06	2.31216e+06	1.78601e+06	3.00071e+06	1.88401e+06	1.30945e+06	3.13421e+06	2.24612e+06	1.65371e+06	3.01907e+06	1.89355e+06	1.25764e+06	3.1177e+06	2.31216e+06	1.78601e+06	3.00071e+06
D150	ZHANG XI WU	1	378339	1679.58	1615.2	1551.19	1681.56	1621.52	1538.46	1674.42	1585.09	1518.49	1680.82	1642.23	1609.74	1681.46	1609.11	1528.55	1681.56	1621.52	1538.46	1674.42	1585.09	1518.49	1680.82	1642.23	1609.74	1681.46	1609.11	1528.55	1.51498e+06	1.08675e+06	781202	1.53873e+06	1.18741e+06	885203	1.47994e+06	918407	605677	1.53483e+06	1.18044e+06	890524	1.50552e+06	1.04888e+06	717460	1.53873e+06	1.18741e+06	885203	1.47994e+06
D151	ZHANG XIAO JIN	0	389674	2083.75	2102.51	2088.41	2077.8	2098	2096.07	2086.31	2096.8	2072.22	2082.23	2104.52	2087.51	2088.77	2110.51	2095.51	2077.8	2098	2096.07	2086.31	2096.8	2072.22	2082.23	2104.52	2087.51	2088.77	2110.51	2095.51	545075	245940	175513	573484	297930	196462	517693	200260	179844	567239	247380	160002	519736	230765	165079	573484	297930	196462	517693
D152	ZHANG XIU YING	0	340141	2325.82	2282	2234.59	2327.76	2291.09	2238.99	2319.87	2249.91	2185.73	2325.63	2291.31	2254.41	2329.96	2294.02	2254.72	2327.76	2291.09	2238.99	2319.87	2249.91	2185.73	2325.63	2291.31	2254.41	2329.96	2294.02	2254.72	2.76772e+06	1.89828e+06	1.33294e+06	2.80367e+06	2.05781e+06	1.51607e+06	2.71775e+06	1.73987e+06	1.16911e+06	2.8207e+06	2.03472e+06	1.45975e+06	2.72685e+06	1.73784e+06	1.14292e+06	2.80367e+06	2.05781e+06	1.51607e+06	2.71775e+06
D153	ZHANG YU MIN	1	313517	2426.96	2431.89	2433.2	2427.08	2432.36	2433.75	2428.61	2434.13	2435.38	2425.11	2428.36	2430	2427.06	2432.83	2433.89	2427.08	2432.36	2433.75	2428.61	2434.13	2435.38	2425.11	2428.36	2430	2427.06	2432.83	2433.89	28834.5	9693.85	7194.08	25500.4	5329.74	4674.13	28365	7706.77	5971.4	38572.6	17858.9	12159.7	22739.4	7535.8	5610.25	25500.4	5329.74	4674.13	28365
D154	ZHAO FENG BIN	1	1025011	2021.69	1977.29	1952.5	2025.63	2009.37	1986.83	2025.01	1988.17	1973.24	2019	1973.12	1941.49	2017.06	1934.86	1901.42	2025.63	2009.37	1986.83	2025.01	1988.17	1973.24	2019	1973.12	1941.49	2017.06	1934.86	1901.42	917350	480190	337652	954197	640663	505024	863760	344451	245165	930653	453385	265602	918612	464679	307413	954197	640663	505024	863760
D155	ZHAO SHU QIN	0	1243815	1645.37	1617.54	1513.58	1649.56	1630.41	1499.66	1647.82	1566.24	1362.63	1631.72	1618.44	1579.13	1652.77	1654.73	1599.32	1649.56	1630.41	1499.66	1647.82	1566.24	1362.63	1631.72	1618.44	1579.13	1652.77	1654.73	1599.32	1.16582e+06	462889	361047	1.21476e+06	367585	213803	1.03602e+06	373972	237195	1.24579e+06	587013	471400	1.15836e+06	497525	489576	1.21476e+06	367585	213803	1.03602e+06
D156	ZHAO YAN SHENG	1	330694	2236.65	2207.67	2191.38	2238.55	2220.79	2199.81	2235.43	2209.01	2208.28	2234.89	2202.98	2178.14	2237.7	2196.61	2178.75	2238.55	2220.79	2199.81	2235.43	2209.01	2208.28	2234.89	2202.98	2178.14	2237.7	2196.61	2178.75	1.04651e+06	532623	349546	1.07639e+06	622746	399928	1.01337e+06	494486	355155	1.08293e+06	562120	326273	1.0114e+06	437699	307681	1.07639e+06	622746	399928	1.01337e+06
D157	ZHAO ZHI XUN	1	333531	1911.94	1889.37	1823.5	1914.61	1890.57	1790.4	1914.51	1874.86	1735.29	1909.97	1903.71	1894.26	1908.76	1885.03	1836.46	1914.61	1890.57	1790.4	1914.51	1874.86	1735.29	1909.97	1903.71	1894.26	1908.76	1885.03	1836.46	954899	439842	328040	948269	267997	169719	881470	223095	105737	1.03402e+06	732251	629939	949015	444904	288880	948269	267997	169719	881470
D159	ZHENG SHOU LI	1	315026	2501.36	2494.13	2471.47	2497.99	2494.07	2474.36	2503.69	2487.92	2455.56	2500.58	2498.43	2479.69	2503.29	2495.64	2474.1	2497.99	2494.07	2474.36	2503.69	2487.92	2455.56	2500.58	2498.43	2479.69	2503.29	2495.64	2474.1	333019	189060	101560	348811	242222	131059	318295	129348	67000.5	338445	201198	95227.1	325776	175991	108385	348811	242222	131059	318295
[truncated: 626 more columns]

## Sheet: NOTE
1=发生远端转移
0=没有发生远端转移
From E colunm to end, they are the features neede to be analyzed.
MRN is patients numbere, do not be nalyzed in the research
NOTE:
column_L	1=发生转移	0=没有转移
column_E	F=Female	M=male
column_F	0=无吸烟史	1=有吸烟史
column_G	1=小细胞癌	2=复合小细胞癌	3=其他
column_H-K	clinical pathology stage
远处转移期限＝月
OS=月

## Sheet: FinalFeatures
																		F1-GrayLevelCooccurenceMatrix25	F1-GrayLevelCooccurenceMatrix25	F1-GrayLevelCooccurenceMatrix25	F1-GrayLevelCooccurenceMatrix25	F1-GrayLevelCooccurenceMatrix25	F1-GrayLevelCooccurenceMatrix25	F1-GrayLevelCooccurenceMatrix25	F1-GrayLevelCooccurenceMatrix25	F1-GrayLevelCooccurenceMatrix25	F1-GrayLevelCooccurenceMatrix25	F1-GrayLevelCooccurenceMatrix25	F1-GrayLevelCooccurenceMatrix25	F1-GrayLevelCooccurenceMatrix25	F1-GrayLevelCooccurenceMatrix25	F1-GrayLevelCooccurenceMatrix25	F1-GrayLevelCooccurenceMatrix25	F1-GrayLevelCooccurenceMatrix25	F1-GrayLevelCooccurenceMatrix25	F1-GrayLevelCooccurenceMatrix25	F1-GrayLevelCooccurenceMatrix25	F1-GrayLevelCooccurenceMatrix25	F1-GrayLevelCooccurenceMatrix25	F1-GrayLevelCooccurenceMatrix25	F1-GrayLevelCooccurenceMatrix25	F1-GrayLevelCooccurenceMatrix25	F1-GrayLevelCooccurenceMatrix25	F1-GrayLevelCooccurenceMatrix25	F1-GrayLevelCooccurenceMatrix25	F1-GrayLevelCooccurenceMatrix25	F1-GrayLevelCooccurenceMatrix25	F1-GrayLevelCooccurenceMatrix25	F1-GrayLevelCooccurenceMatrix25
Index	Patients Name		Age	Gender	开始放疗时间－结束时间	远处转移期限	OS	prescrip_PGTV/fraction	prescrip_PTV/fraction	Smoke	pathology	T	N	M	Clinical Stage	是否转移	MRN	-333-1AutoCorrelation	-333-4AutoCorrelation	-333-7AutoCorrelation	0-1AutoCorrelation	0-4AutoCorrelation	0-7AutoCorrelation	45-1AutoCorrelation	45-4AutoCorrelation	45-7AutoCorrelation	90-1AutoCorrelation	90-4AutoCorrelation	90-7AutoCorrelation	135-1AutoCorrelation	135-4AutoCorrelation	135-7AutoCorrelation	180-1AutoCorrelation	180-4AutoCorrelation	180-7AutoCorrelation	225-1AutoCorrelation	225-4AutoCorrelation	225-7AutoCorrelation	270-1AutoCorrelation	270-4AutoCorrelation	270-7AutoCorrelation	315-1AutoCorrelation	315-4AutoCorrelation	315-7AutoCorrelation	-333-1ClusterProminence	-333-4ClusterProminence	-333-7ClusterProminence	0-1ClusterProminence	0-4ClusterProminence
D1	P1		49	F	2014.8.19--10.1	12.22	14.55			No	1	T2	N2	M0	IIIA	1	1276901	2143.99	2061.76	1996.39	2152.76	2091.93	2046.22	2142.45	2067.71	2027.66	2141.87	2059.6	1974.41	2138.59	2022.11	1918.53	2152.76	2091.93	2046.22	2142.45	2067.71	2027.66	2141.87	2059.6	1974.41	2138.59	2022.11	1918.53	1.59945e+06	887297	485103	1.65149e+06	1.10817e+06
D2	P2		59	M	2014.9.18--10.30	14.26	14.26			Yes	1	T2	N2	M0	IIIA	0	1288053	2297.17	2311.93	2306.35	2294.86	2311.59	2309.95	2297.12	2310.02	2307.68	2294.4	2309.36	2307.89	2302.39	2316.98	2298.98	2294.86	2311.59	2309.95	2297.12	2310.02	2307.68	2294.4	2309.36	2307.89	2302.39	2316.98	2298.98	604203	261401	161281	621731	259757
D3	P3		58	F	2014.8.10--9.30	13.7	15.34			Yes	1	T1	N2	M0	IIIA	1	1199949	2147.55	2082.65	2019.96	2153.78	2095.47	2025.18	2145.81	2064.55	1981.05	2148.86	2102.67	2063.05	2141.6	2065.08	2002.08	2153.78	2095.47	2025.18	2145.81	2064.55	1981.05	2148.86	2102.67	2063.05	2141.6	2065.08	2002.08	3.05411e+06	1.64482e+06	1e+06	3.17836e+06	2.06427e+06
D4	P4		49	M	2014.1.16--2.20	22.37	22.37			Yes	1	T2	N2	M0	IIIA	0	1115865	2468.22	2468.54	2451.96	2466.58	2471	2462.4	2466.91	2465.67	2459.84	2467.19	2466.18	2451.82	2472.32	2471.49	2428.71	2466.58	2471	2462.4	2466.91	2465.67	2459.84	2467.19	2466.18	2451.82	2472.32	2471.49	2428.71	212242	52237	44527.3	217181	46210.9
D5	P5		38	M	2014.7.11--8.21	12.94	12.94			Yes	1	T4	N2	M0	IIIA	0	376864	2065.17	2064.96	2041.45	2063.96	2070.45	2048.36	2070.6	2057.34	1992.02	2065.18	2071.96	2071.84	2060.98	2058.34	2036.43	2063.96	2070.45	2048.36	2070.6	2057.34	1992.02	2065.18	2071.96	2071.84	2060.98	2058.34	2036.43	315953	110328	85811.8	339651	106039
D6	P6		48	F	2013.5.3--6.20	6.14	16.76			No	1	T2	N3	M0	IIIA	1	333234	2149.73	2140.05	2132.05	2147.88	2142.1	2131.44	2149.5	2130.45	2128.32	2149.7	2150.7	2132.05	2151.86	2135.52	2136.65	2147.88	2142.1	2131.44	2149.5	2130.45	2128.32	2149.7	2150.7	2132.05	2151.86	2135.52	2136.65	1.01657e+06	381337	233126	1.03908e+06	328287
D7	P7		56	M	2014.10.8--12.08	13.01	13.01			Yes	1	T3	N0	M0	IIA	0	389795	1683.54	1606.65	1538.83	1689.58	1630.47	1570.78	1676.69	1570.61	1462.96	1683.98	1616.66	1560.62	1683.78	1605.08	1546.32	1689.58	1630.47	1570.78	1676.69	1570.61	1462.96	1683.98	1616.66	1560.62	1683.78	1605.08	1546.32	1.9012e+06	1.38979e+06	1.04117e+06	1.92821e+06	1.47862e+06
D8	P8		64	M	2014.5.1--6.11	8.74	10.58			Yes	1	T2	N2	M0	IIIA	1	1212853	2012.7	1973.08	1928.6	2014.54	1986.11	1909.64	2009.91	1961.9	1894.18	2010.94	1985.35	1961.76	2015.38	1956.31	1938.85	2014.54	1986.11	1909.64	2009.91	1961.9	1894.18	2010.94	1985.35	1961.76	2015.38	1956.31	1938.85	435183	123102	83684.4	452391	147557
D9	P9		61	M	2013.9.23--11.07	25.63	25.63			Yes	1	T4	N2	M0	IIIB	0	345901	2339.42	2338.92	2334.78	2340.11	2339.43	2337.13	2341.1	2339.75	2339.72	2338.6	2341.23	2336.78	2337.9	2335.02	2324.86	2340.11	2339.43	2337.13	2341.1	2339.75	2339.72	2338.6	2341.23	2336.78	2337.9	2335.02	2324.86	125604	40919.5	27875.6	120052	22898.2
D10	P10		58	F	2014.12.31-2014.2.1	9.95	9.95			No	1	T4	N3	M0	IIIB	0	1351741	2239.29	2206.44	2163.8	2240.38	2231.68	2181.32	2233.86	2193.81	2161.86	2234.37	2208.92	2157.59	2248.75	2187.03	2148.33	2240.38	2231.68	2181.32	2233.86	2193.81	2161.86	2234.37	2208.92	2157.59	2248.75	2187.03	2148.33	612711	232707	137714	623456	250467
D11	P11		73	M	2014.4.18-2014.6.16	4.01	4.01			No	1	T4	N3	M0	IIIB	0	365848	2335.02	2324.29	2306.08	2335.7	2334.8	2323.62	2337.83	2326.31	2309.64	2332.98	2322.28	2300.69	2333.56	2313.16	2288.49	2335.7	2334.8	2323.62	2337.83	2326.31	2309.64	2332.98	2322.28	2300.69	2333.56	2313.16	2288.49	1.05278e+06	562864	342615	1.08525e+06	680973
D12	P12		51	F	2014.3.24--4.20	23.52	23.52			Yes	1	T2	N2	M0	IIIA	0	1164974	1531.93	1491.36	1372.31	1537.86	1476.97	1316.99	1546.44	1492.77	1238.11	1516.39	1523.02	1476.77	1527.8	1460.74	1353.8	1537.86	1476.97	1316.99	1546.44	1492.77	1238.11	1516.39	1523.02	1476.77	1527.8	1460.74	1353.8	335662	137739	130886	323447	82408.8
D13	P13		66	M	2014.10.24--11.30	3.88	3.88			Yes	1	T2	N3	M0	IIIB	0	385963	2299.26	2226.92	2152.9	2298.68	2230.53	2152.29	2294.33	2200.38	2115.76	2305.87	2252.62	2194.85	2298.01	2220.45	2139.3	2298.68	2230.53	2152.29	2294.33	2200.38	2115.76	2305.87	2252.62	2194.85	2298.01	2220.45	2139.3	1.50144e+06	833234	573330	1.54984e+06	981269
D14	P14		58	F	2014.11.1--12.29	9.2	12.29			Yes	1	T3	N3	M0	IIIB	1	385533	2605.99	2604.62	2603.37	2605	2602.21	2601.15	2605	2604.66	2604.41	2606.79	2607.46	2605.49	2607.15	2604.24	2602.76	2605	2602.21	2601.15	2605	2604.66	2604.41	2606.79	2607.46	2605.49	2607.15	2604.24	2602.76	17517.8	4627.61	3873.59	21158.6	6297.66
D15	P15		56	M	2013.7.3--8.10	28.48	28.48	60Gy/30	54Gy/30	No	2	T3	N2	M0	IIIA	0	340258	2384.04	2384.84	2373.67	2384.12	2387.79	2381.5	2384.72	2381.01	2350.12	2379.95	2384.03	2382.75	2387.56	2386.25	2372.94	2384.12	2387.79	2381.5	2384.72	2381.01	2350.12	2379.95	2384.03	2382.75	2387.56	2386.25	2372.94	8907.66	3052.58	3430.27	16412.4	3056.71
D17	P16		51	M	2014.3.19--4.30	15.87	18.99	60Gy/33	54Gy/33	Yes	1	T4	N3	M0	IIIB	1	1232898	2252.36	2243.33	2234.86	2254.57	2254.93	2244.57	2253.7	2230.79	2200.8	2249.27	2239.51	2232.04	2251.93	2246.39	2253.21	2254.57	2254.93	2244.57	2253.7	2230.79	2200.8	2249.27	2239.51	2232.04	2251.93	2246.39	2253.21	545072	222767	150297	559586	276111
D18	P17		70	F	2013.1.8--3.18	29.67	29.67	60Gy/30	54Gy/30	No	1	T2	N2	M0	IIIA	0	331553	1949.64	1900.91	1855.6	1952.62	1915.35	1856.09	1956.4	1897.44	1804.99	1947.94	1914.07	1887.1	1941.7	1874.69	1860.12	1952.62	1915.35	1856.09	1956.4	1897.44	1804.99	1947.94	1914.07	1887.1	1941.7	1874.69	1860.12	1.19318e+06	672908	465255	1.21015e+06	697316
D19	P18		53	M	2013.6.21--8.9	28.48	28.48		60/30	Yes	1	T4	N3	M0	IIIB	0	1092496	1816.8	1812.62	1758.57	1820.74	1846.18	1798.06	1817.78	1816.28	1820.54	1809.46	1801.48	1773.52	1819.38	1784.4	1604.73	1820.74	1846.18	1798.06	1817.78	1816.28	1820.54	1809.46	1801.48	1773.52	1819.38	1784.4	1604.73	1.47219e+06	781509	474321	1.49916e+06	861107
D20	P19		39	M	2014.10.15--11.28	13.01	13.01	60Gy/30	54Gy/30	No	1	T2	N2	M0	IIIA	0	388226	860.837	808.896	776.995	864.249	821.513	789.754	858.332	810.639	793.841	861.824	808.831	793.235	858.835	793.188	723.829	864.249	821.513	789.754	858.332	810.639	793.841	861.824	808.831	793.235	858.835	793.188	723.829	1.19939e+06	800761	633863	1.22378e+06	853460
D21	P20		60	F	2013.9.18--11.18	15.87	16.53		52/26	No	1		N3	M0	IIIB	1	1148360	2029.48	1964.05	1906.67	2034.09	1982.05	1964.7	2021.83	1948.14	1854.59	2030.79	1963.73	1895.26	2030.97	1958.62	1887.43	2034.09	1982.05	1964.7	2021.83	1948.14	1854.59	2030.79	1963.73	1895.26	2030.97	1958.62	1887.43	711638	315535	241976	727014	292057
D23	P21		50	F	2013.8.21--10.10	10.05	11.27	50/25	45/25	No	2	T4	N2	M0	IIIB	1	337310	2485.02	2427.21	2369.62	2487.77	2441	2388.65	2482.54	2407.42	2343.25	2487.21	2442.29	2392.08	2482.48	2415.74	2348.25	2487.77	2441	2388.65	2482.54	2407.42	2343.25	2487.21	2442.29	2392.08	2482.48	2415.74	2348.25	2.33603e+06	1.64381e+06	1.0169e+06	2.3647e+06	1.83208e+06
D24	P22		58	F	2014.3.11--5.1	7.82	9.4	53.4/25	50/25	No	1	T3	N3	M0	IIIB	1	354750	2324.9	2332.14	2313.45	2318.68	2326.46	2316.44	2330.35	2329.14	2285.57	2324.91	2338.98	2328.3	2325.82	2334.01	2319.4	2318.68	2326.46	2316.44	2330.35	2329.14	2285.57	2324.91	2338.98	2328.3	2325.82	2334.01	2319.4	208857	74729.6	50274.7	228102	88570.7
D25	P23		64	F	2014.7.20--	15.57	15.57	60/30	54/30	Yes	1	T4	N3	M0	IIIB	0	378699	2557.41	2536.26	2525.15	2562.83	2549.05	2534.75	2559.65	2534.93	2524.15	2551.37	2524.85	2517.41	2555.85	2536.34	2524.34	2562.83	2549.05	2534.75	2559.65	2534.93	2524.15	2551.37	2524.85	2517.41	2555.85	2536.34	2524.34	416229	148704	108065	409573	105543
D26	P24		48	M	2013.11.19--12.30	13.73	26.05	56/28	50.4/28	No	1	T2	N3	M0	IIIB	1	345082	2119.5	1991.96	1907.23	2121.53	2017.76	1930	2123.62	1977.73	1851.06	2128.42	2013.5	1936.89	2103.82	1947.42	1876.9	2121.53	2017.76	1930	2123.62	1977.73	1851.06	2128.42	2013.5	1936.89	2103.82	1947.42	1876.9	3.39446e+06	1.13546e+06	488884	3.48164e+06	1.5055e+06
D27	P25		51	M	2014.11.23--12.30	4.01	7		60/30	Yes	1	T3	N2	M0	IIIA	1	01281453-2	611.441	444.578	367.954	648.853	520.071	429.854	593.093	402.773	314.309	607.083	429.954	369.787	596.055	419.897	348.708	648.853	520.071	429.854	593.093	402.773	314.309	607.083	429.954	369.787	596.055	419.897	348.708	5.60095e+06	4.51083e+06	4.06903e+06	5.92133e+06	5.26623e+06
D28	P26		68	F	2012.11.19--2013.1.17	12.21			60/30	Yes	1	T4	N2	M0	IIIB	1	326938	2407.74	2418.57	2421.65	2405.25	2416.94	2414.88	2408.84	2418.23	2420.44	2405.39	2417.96	2425.22	2411.58	2421.37	2426.04	2405.25	2416.94	2414.88	2408.84	2418.23	2420.44	2405.39	2417.96	2425.22	2411.58	2421.37	2426.04	48499.3	14274.9	10487	41690.9	11267.9
D29	P27		55	F	2013.8.07-9.20	22.74	22.74		60/30	No	1	T4	N1	M0	IIIA	0	1102435	2257.81	2263.58	2248.45	2258.27	2262.64	2248.78	2257.6	2264.71	2251.26	2252.79	2262.75	2266.95	2262.81	2264.36	2210.69	2258.27	2262.64	2248.78	2257.6	2264.71	2251.26	2252.79	2262.75	2266.95	2262.81	2264.36	2210.69	355775	106085	46574.8	380643	136400
D30	P28		47	M	2014.12.26--2015.2.10	9.79	12.85		60/30	Yes	1	T3	N3	M0	IIIB	1	1262926	2465.4	2476.98	2477.87	2464.26	2477.47	2479.84	2466.35	2479.52	2482.32	2462.92	2472.93	2473.2	2468.13	2478.25	2476.44	2464.26	2477.47	2479.84	2466.35	2479.52	2482.32	2462.92	2472.93	2473.2	2468.13	2478.25	2476.44	88448.8	27919.7	21507.1	100189	35562.2
D31	P29		64	M	2014.6.20--8.15	9.66	15.7	60/30	54/30	Yes	1	T2	N2	M0	IIIA	1	378569	2579.5	2578.34	2575.22	2578.33	2577.22	2575.9	2581.82	2579.2	2572.76	2578.16	2579.61	2575.37	2579.72	2577.27	2576.85	2578.33	2577.22	2575.9	2581.82	2579.2	2572.76	2578.16	2579.61	2575.37	2579.72	2577.27	2576.85	83714.3	27735.6	23005.4	76095.5	16829.6
D32	P30		50	F	2014.4.25--6.10	19.35	29.34	64/32	57.6/32	No	1	T4	N3	M0	IIIB	1	372802	2431	2401.75	2382.63	2433.38	2414.24	2387.19	2431.23	2389.75	2376.9	2429.72	2402.67	2387.09	2429.66	2398.47	2377.3	2433.38	2414.24	2387.19	2431.23	2389.75	2376.9	2429.72	2402.67	2387.09	2429.66	2398.47	2377.3	668942	302671	176796	700649	475228
D33	P31		56	M	2012.11.30--2013.1.20	5.68	18.92		60/30	Yes	1	T3	N3	M0	IIIB	1	322144	2279.53	2210.79	2173.89	2283.71	2228.6	2178.89	2276.06	2193.24	2132.78	2277.49	2214.14	2189.45	2280.82	2204.84	2194.82	2283.71	2228.6	2178.89	2276.06	2193.24	2132.78	2277.49	2214.14	2189.45	2280.82	2204.84	2194.82	687973	252813	213120	712610	299056
D34	P32		66	M	2014.12.17--1.10	7.92	10.55		60/30	Yes	1	T3	N1	M0	IIIA	1	12386948	1869.85	1892.36	1888.88	1867.35	1888.75	1885.03	1877.85	1905.75	1888.71	1862.52	1878.27	1881.92	1871.94	1898.69	1901.27	1867.35	1888.75	1885.03	1877.85	1905.75	1888.71	1862.52	1878.27	1881.92	1871.94	1898.69	1901.27	956405	472188	361572	1.01959e+06	634635
D35	P33		54	F	2014.1.25--	9.1	9.1		60/30	Yes	1	T4	N2	M0	IIIB	0	357443	2534.07	2523.4	2519.53	2540.26	2532.09	2526.93	2535.42	2523.58	2516.22	2529.93	2516.63	2516.26	2530.59	2520.7	2517.2	2540.26	2532.09	2526.93	2535.42	2523.58	2516.22	2529.93	2516.63	2516.26	2530.59	2520.7	2517.2	94904.9	24453.6	21196	102266	21568.4
D36	P34		56	F	2014.3.20--	8.94	9.53	54/27	48.6/27	Yes	1	T3	N2	M0	IIIA	1	355810	1982.04	1853.71	1706.59	1984.17	1882.87	1743.07	1981.98	1839.52	1700.92	1987.15	1881.93	1719.3	1974.51	1795.21	1627	1984.17	1882.87	1743.07	1981.98	1839.52	1700.92	1987.15	1881.93	1719.3	1974.51	1795.21	1627	1.20118e+06	590760	351415	1.23546e+06	668224
D37	P35		66	F	2014.4.2	6.31	6.31		60/30	No	1	T2	N3	M0	IIIB	0	1044840	1392.8	1361.85	1318.68	1387.42	1342.8	1268.37	1382.06	1332.47	1305.99	1399.23	1392.35	1398.07	1402.37	1377	1291.44	1387.42	1342.8	1268.37	1382.06	1332.47	1305.99	1399.23	1392.35	1398.07	1402.37	1377	1291.44	1.15133e+06	737840	573287	1.16278e+06	723435
D38	P36		84	M	2012.10.25--12.4		37.03		60/30	Yes	1	T2	N0	M0	IIA	1	319851	2278.06	2191.01	2183.63	2277.16	2148.34	2132.55	2261.9	2175.33	2300.64	2282.09	2222.35	2192.22	2290.23	2214.04	2179.79	2277.16	2148.34	2132.55	2261.9	2175.33	2300.64	2282.09	2222.35	2192.22	2290.23	2214.04	2179.79	440802	161185	126404	452465	148227
D39	P37		43	M	2013.7.10--9.20	22.51	22.51		60/30	No	1	T3	N2	M0	IIIA	0	1112725	2040.84	2016.05	1952.22	2051.76	2049.22	2003.89	2048.68	2004.98	1909.43	2025.52	1990.06	1938.04	2037.83	2021.18	1949.17	2051.76	2049.22	2003.89	2048.68	2004.98	1909.43	2025.52	1990.06	1938.04	2037.83	2021.18	1949.17	722313	312520	211611	713699	194369
D41	P38		58	M	2014..3.2	20.34	20.34		60/30	Yes	1	T4	N3	M0	IIIB	0	1172664	2522.76	2519.71	2508.67	2522.06	2516.28	2503.29	2521.49	2511.36	2496.35	2522.07	2527.26	2523.97	2525.44	2522.45	2504.27	2522.06	2516.28	2503.29	2521.49	2511.36	2496.35	2522.07	2527.26	2523.97	2525.44	2522.45	2504.27	154087	48578.2	41654.5	149465	47625.2
D42	P39		61	M	2013.9.10	5.2		58.8/28	50.4/28	Yes	1	T2	N2	M0	IIIA	0	351621	2264.59	2231.15	2202.13	2267.75	2249.05	2221.83	2261.3	2203.43	2163.74	2263.24	2232.06	2208.93	2266.02	2238.27	2209.11	2267.75	2249.05	2221.83	2261.3	2203.43	2163.74	2263.24	2232.06	2208.93	2266.02	2238.27	2209.11	2.05664e+06	1.25654e+06	709432	2.09631e+06	1.513e+06
D43	P40		46	F	2013.6.13--7.30	20.27	20.27		60/30	No	1	T2	N2	M0	IIIA	0	1101691	1812.46	1817.68	1739.01	1806.73	1828.26	1762.08	1822.97	1809.6	1681.21	1804.55	1817.55	1779.7	1816.02	1813.85	1706.89	1806.73	1828.26	1762.08	1822.97	1809.6	1681.21	1804.55	1817.55	1779.7	1816.02	1813.85	1706.89	767630	352524	269546	801551	368497
D44	P41		57	M	2013.11.20--	4.04	5.32		60/30	Yes	1	T3	N2	M0	IIIA	1	1173360	2445.08	2455.1	2455.91	2442.4	2453.02	2455.32	2445.82	2454.91	2453.5	2445.07	2456.09	2458.36	2447.04	2456.36	2456.21	2442.4	2453.02	2455.32	2445.82	2454.91	2453.5	2445.07	2456.09	2458.36	2447.04	2456.36	2456.21	111990	39362.3	25306.5	122945	50610.6
D45	P42		65	M	2012.11.12-	11.93	16.26		60/30	Yes	1	T4	N3	M0	IIIB	1	1027768	2075.43	2006.7	1944.32	2075.55	2026.14	1961.03	2062.39	1943.65	1899.04	2078.57	2033.3	1948.13	2085.1	2018.46	1963.84	2075.55	2026.14	1961.03	2062.39	1943.65	1899.04	2078.57	2033.3	1948.13	2085.1	2018.46	1963.84	1.05376e+06	469912	251250	1.06348e+06	481358
D46	P43		71	F	2013.11.01	6.47	8.57		60/30	Yes	1	T3	N3	M0	IIIB	0	1169256	2163.93	2062.63	1990.54	2163.64	2045.88	1992.94	2184.31	2108.43	1988.45	2165.05	2108.1	2033.48	2142.16	1971.51	1915.95	2163.64	2045.88	1992.94	2184.31	2108.43	1988.45	2165.05	2108.1	2033.48	2142.16	1971.51	1915.95	1.36827e+06	519528	347517	1.45764e+06	667176
D47	P44		76	M	2014.7.5--	14.59	14.59	60/30	54/30	Yes	1	T2	N3	M0	IIIB	0	369553	2389.37	2404.95	2410.09	2387.28	2403.18	2410.99	2391.35	2406.87	2410.77	2387.22	2401.44	2404.63	2391.75	2409.16	2415.8	2387.28	2403.18	2410.99	2391.35	2406.87	2410.77	2387.22	2401.44	2404.63	2391.75	2409.16	2415.8	92219.8	46115.6	34550.2	96884.2	45517.4
D48	P45		56	M	2014.1.20--	8.51	22.34	60/30	54/30	Yes	1	T1	N2	M0	IIIA	1	354148	2561.14	2561.58	2567.6	2559.69	2560.49	2565.25	2561.29	2563.9	2575.35	2561.64	2560.06	2564.51	2561.96	2562.18	2566.53	2559.69	2560.49	2565.25	2561.29	2563.9	2575.35	2561.64	2560.06	2564.51	2561.96	2562.18	2566.53	70257.7	28513.4	20992.8	101230	52189
D49	P46		75	M	2013.8.7--9.20	5.36	5.95		60/30	Yes	1	T3	N2	M0	IIIA	1	1136309	2283.47	2230.82	2188.28	2274.76	2204.56	2189.2	2277.72	2195.7	2117.74	2287.05	2262.07	2233.86	2294.23	2255.89	2189.83	2274.76	2204.56	2189.2	2277.72	2195.7	2117.74	2287.05	2262.07	2233.86	2294.23	2255.89	2189.83	953873	249433	155897	1.03501e+06	272941
D50	P47		60	M	2015.1.24-3.10	3.13			60/30	Yes	2	T3	N3	M0	IIIB	1	1334529	2157.67	2163.65	2128.54	2157.74	2167.39	2144.92	2159.12	2187.15	2159.19	2148.92	2154.23	2127.68	2165.14	2146	2077.52	2157.74	2167.39	2144.92	2159.12	2187.15	2159.19	2148.92	2154.23	2127.68	2165.14	2146	2077.52	834228	336539	251199	822327	279896
D51	P48		56	M	2013.1.10--2.10	6.31	19.12		60/30	Yes	1		N3	M0	IIIB	1	323641	1387.95	1326.05	1262.78	1386.94	1326.53	1271.12	1387.11	1319.01	1262.34	1391.77	1347.41	1311.24	1385.87	1307.95	1186.71	1386.94	1326.53	1271.12	1387.11	1319.01	1262.34	1391.77	1347.41	1311.24	1385.87	1307.95	1186.71	1.35485e+06	823744	555632	1.3776e+06	851887
D52	P49		71	F	2013.3.10--4.20	16.33	16.33		60/30	No	1	T4	N3	M0	IIIB	0	1092569	2233.85	2164.35	2078.97	2230.63	2133.4	2041.5	2228.8	2116.4	2086.18	2230.45	2192.32	2144.33	2245.65	2205.59	2011.48	2230.63	2133.4	2041.5	2228.8	2116.4	2086.18	2230.45	2192.32	2144.33	2245.65	2205.59	2011.48	790941	157242	146497	857468	194800
D53	P50		52	F	2012.8.10--9.20	38.28	38.28	60/30	54/30	No	1	T2	N1	M0	IIA	0	318128	1604.99	1495.75	1333.59	1615.48	1541.07	1440	1592.67	1481.54	1292.4	1600.2	1497.31	1360.4	1611.69	1454.59	1160.11	1615.48	1541.07	1440	1592.67	1481.54	1292.4	1600.2	1497.31	1360.4	1611.69	1454.59	1160.11	588071	352906	302817	592752	333955
D54	P51		67	F	2014.7.30--9.20	9.99	16.03		60/30	No	1	T3	N2	M0	IIIA	1	1155635	2672.33	2667.17	2663.49	2673.75	2666.4	2668.72	2676.74	2665.32	2646.76	2670.97	2661.47	2659.83	2667.82	2676.03	2678.59	2673.75	2666.4	2668.72	2676.74	2665.32	2646.76	2670.97	2661.47	2659.83	2667.82	2676.03	2678.59	367886	139376	80929.8	392104	157573
D55	P52		46	M	2012.10.15--11.30	6.34	10.25		60/30	Yes	1	T3	N2	M0	IIIA	1	322017	2164.99	2165.91	2138.33	2156.51	2153.41	2138.61	2169.41	2161.27	2113.25	2167.7	2177.57	2146.19	2166.56	2172.5	2154.14	2156.51	2153.41	2138.61	2169.41	2161.27	2113.25	2167.7	2177.57	2146.19	2166.56	2172.5	2154.14	575468	214595	123880	622824	319568
D56	P53		57	F	2014.12.30--2015.2.10	7.49	7.49	60/30	54/30	Yes	1		N3	M0	IIIB	0	389581	2553.98	2558.24	2558.16	2553.85	2559.48	2551.65	2556.41	2556	2561.49	2551.45	2560.57	2563.19	2554.34	2556.14	2556.98	2553.85	2559.48	2551.65	2556.41	2556	2561.49	2551.45	2560.57	2563.19	2554.34	2556.14	2556.98	2396.08	1183.15	1123.87	2399.35	1128.9
D57	P54		49	F	2013.7.10--9.30	23.39	23.39	60/30	54/30	No	1	T2	N2	M0	IIIA	0	1136107	2522.7	2527.87	2529.45	2522.03	2527.68	2529.45	2523.74	2523.14	2517.91	2521.13	2529.08	2530.62	2523.95	2531.38	2538.69	2522.03	2527.68	2529.45	2523.74	2523.14	2517.91	2521.13	2529.08	2530.62	2523.95	2531.38	2538.69	23065.7	8423.12	7059.8	26957.3	6748.67
D58	P55		55	M	2014.3.10--	13.17	13.17	58.8/28	50.4/28	Yes	1	T2	N2	M0	IIIA	0	365268	2336.28	2313.85	2291.86	2339.79	2329.53	2307.69	2335.34	2315.93	2287.21	2330.67	2307.58	2282.24	2339.45	2301.63	2290.97	2339.79	2329.53	2307.69	2335.34	2315.93	2287.21	2330.67	2307.58	2282.24	2339.45	2301.63	2290.97	683960	310045	182715	711227	447708
D59	P56		73	M	2014.1.6--2.20	13.67	17.41	60/30	54/30	Yes	1	T2	N2	M0	IIIA	1	356043	2180.94	2160.58	2117.87	2182.89	2183.43	2169.04	2183.97	2162.19	2128	2178.95	2155.77	2110.86	2177.96	2138.06	2046.92	2182.89	2183.43	2169.04	2183.97	2162.19	2128	2178.95	2155.77	2110.86	2177.96	2138.06	2046.92	732925	391432	303166	757640	404426
D60	P57		71	M	2014.4.1--5.20	24.44	24.44		66/33	Yes	2	T1	N2	M0	IIIA	0	1141051	2085.11	2099.82	2092.04	2082.09	2107.8	2112.1	2083.85	2086.45	2084.48	2083.57	2100.21	2086.22	2091.13	2105.36	2081.59	2082.09	2107.8	2112.1	2083.85	2086.45	2084.48	2083.57	2100.21	2086.22	2091.13	2105.36	2081.59	437231	235261	165953	458029	271823
D61	P58		61	F	2014.3.2--4.20	7.59	10.18	60/30	54/30	Yes	1	T4	N2	M0	IIIB	1	352611	2520.3	2516.08	2505.88	2521.74	2523.57	2495.19	2515.24	2500.93	2529.81	2514.44	2530.79	2542.07	2529.95	2503.45	2441.46	2521.74	2523.57	2495.19	2515.24	2500.93	2529.81	2514.44	2530.79	2542.07	2529.95	2503.45	2441.46	66512.8	17373.6	22843.3	97989.3	18248.7
D62	P59		66	M	2015.2.7--3.20	3.29	6.54	60/30	54/30	Yes	1	T4	N2	M0	IIIB	1	396416	2275.86	2268.35	2262.71	2274.32	2267.73	2253.41	2275.61	2259	2246.47	2276.22	2276.83	2279.48	2277.31	2269.19	2269.73	2274.32	2267.73	2253.41	2275.61	2259	2246.47	2276.22	2276.83	2279.48	2277.31	2269.19	2269.73	1.48067e+06	827410	534258	1.53819e+06	1.06051e+06
D63	P60		46	F	2013.7.30--	23	23	60/30	54/30	No	1	T2	N2	M0	IIIA	0	344561	2307.94	2306.99	2297.65	2309.64	2311.42	2300.39	2310.51	2305.03	2285.89	2302.41	2307.95	2299.48	2309.45	2302.33	2308.68	2309.64	2311.42	2300.39	2310.51	2305.03	2285.89	2302.41	2307.95	2299.48	2309.45	2302.33	2308.68	5208.27	2911.18	1753.15	3695.8	1688.96
D64	P61		57	M	2014.1.5--2.20	4.01	4.01			Yes	1	T2	N2	M0	IIIA	0	363361	2319.25	2338.26	2347.28	2318.2	2331.57	2331.18	2321.36	2338.39	2350.09	2316.57	2338.14	2354.74	2320.95	2345.88	2356.06	2318.2	2331.57	2331.18	2321.36	2338.39	2350.09	2316.57	2338.14	2354.74	2320.95	2345.88	2356.06	101646	62655.1	49979.3	106426	70246.4
D65	P62		67	M	2014.2.10--3.30	21.88	21.88	60/30	54/30	Yes	1	T3	N0	M0	IIB	0	358264	2302.77	2224.1	2149.89	2301.9	2242.01	2177.76	2296.46	2172.56	2167.68	2302.73	2227.2	2130.92	2309.83	2242.86	2123.77	2301.9	2242.01	2177.76	2296.46	2172.56	2167.68	2302.73	2227.2	2130.92	2309.83	2242.86	2123.77	710305	371973	267607	790153	406988
D66	P63		60	M	2014.8.1--9.20	15.87	15.87	60/30	54/30	Yes	2	T2	N3	M0	IIIB	0	374520	2479.31	2491.88	2496.26	2477.89	2488.98	2492.64	2479.89	2495.71	2511.2	2477.37	2491.92	2497.01	2482.18	2491.51	2487.14	2477.89	2488.98	2492.64	2479.89	2495.71	2511.2	2477.37	2491.92	2497.01	2482.18	2491.51	2487.14	9475.57	4286.55	2611.95	8434.43	2750.01
D67	P64		67	M	2015.2.6--3.17	9.63	9.63		60/30	Yes	2	T2	N2	M0	IIIA	0	1205024	2213.67	2188.68	2126.37	2210.3	2196.63	2165.87	2208.28	2166.26	2113.42	2216.98	2206.23	2149.6	2219.15	2182.4	2053	2210.3	2196.63	2165.87	2208.28	2166.26	2113.42	2216.98	2206.23	2149.6	2219.15	2182.4	2053	1.47875e+06	565807	332607	1.57555e+06	658173
D68	P65		48	M	2012.11.9--12.20	33.18	33.18		60/30	No	1	T3	N2	M0	IIIA	0	321542	1974.99	1966.86	1921.36	1967.98	1971.89	1938.6	1971.65	1968.08	1943.09	1975.54	1978.33	1957.13	1985.01	1946.46	1826.19	1967.98	1971.89	1938.6	1971.65	1968.08	1943.09	1975.54	1978.33	1957.13	1985.01	1946.46	1826.19	786238	343134	243317	846168	448668
D69	P66		56	F	2013.3.1--	22.8	22.8	60/30	54/30	No	1	T2	N2	M0	IIIA	0	325586	2279.83	2269.68	2222.77	2272.47	2290.73	2300.39	2283	2251.42	2119.12	2281.77	2263.09	2156.63	2282.5	2264.94	2210.93	2272.47	2290.73	2300.39	2283	2251.42	2119.12	2281.77	2263.09	2156.63	2282.5	2264.94	2210.93	105786	63312.6	72739.2	121584	95544.3
D70	P67		50	M	2013.11.18--12.30	16.2	21.49		60/30	Yes	1	T4	N2	M0	IIIB	1	1177039	1736.58	1646.3	1560.9	1741.77	1673.05	1604.28	1727.32	1593.74	1473.75	1737.09	1656.53	1574.6	1740	1658.44	1580.25	1741.77	1673.05	1604.28	1727.32	1593.74	1473.75	1737.09	1656.53	1574.6	1740	1658.44	1580.25	2.93254e+06	1.88432e+06	1.34783e+06	2.9921e+06	2.08099e+06
D71	P68		67	M	2014.2.28--4.18	20.63	20.63	56/28	50.4/28	Yes	2		N3	M0	IIIB	0	1186932	2440.26	2445.11	2431.12	2439.23	2445.74	2433.85	2443.3	2437.82	2424.49	2436.34	2450.96	2434.64	2442.38	2444.44	2426.51	2439.23	2445.74	2433.85	2443.3	2437.82	2424.49	2436.34	2450.96	2434.64	2442.38	2444.44	2426.51	51537.2	15100.7	16574.4	38101.9	12436.4
D72	P69		67	F	2014.2.28--3.28	6.77	6.77		60/30	No	1	T4	N3	M0	IIIB	0	1200040	2426.75	2409.96	2399.82	2425.09	2415.87	2405.64	2428.34	2407.64	2403.92	2427.61	2410.84	2393.12	2426	2404.71	2395.75	2425.09	2415.87	2405.64	2428.34	2407.64	2403.92	2427.61	2410.84	2393.12	2426	2404.71	2395.75	229130	75191	42625.3	243488	107622
D73	P70		69	M	2014.9.20--10.28	12.12	12.12		60/30	Yes	1		N3	M0	IIIB	0	1227044	2410.98	2411.41	2430.19	2408.41	2426.86	2482.87	2403.61	2400.36	2451.07	2406.78	2380.72	2274.78	2425.2	2432.43	2464.36	2408.41	2426.86	2482.87	2403.61	2400.36	2451.07	2406.78	2380.72	2274.78	2425.2	2432.43	2464.36	195952	78148.8	81899.4	209001	98121.1
D75	P71		57	M	2014.4.10--5.30	9.33	10.48		60/30	Yes	2	T2	N3	M0	IIIB	1	364803	2087.06	2067.75	2010.6	2090.86	2088.75	2045.67	2083.68	2049.28	1973.77	2081.17	2062.22	2012.21	2092.66	2069.11	2000.12	2090.86	2088.75	2045.67	2083.68	2049.28	1973.77	2081.17	2062.22	2012.21	2092.66	2069.11	2000.12	590776	381205	338759	582632	336741
D76	P72		65	M	2014.1.30--3.10	8.28	8.28		60/30	Yes	1	T3	N3	M0	IIIB	0	1104084	2500.36	2498.58	2496.24	2500.05	2498.22	2496.83	2501.5	2500.97	2499.27	2500.71	2500.43	2497.64	2499.16	2494.61	2491.01	2500.05	2498.22	2496.83	2501.5	2500.97	2499.27	2500.71	2500.43	2497.64	2499.16	2494.61	2491.01	123894	51470.2	28541	135358	68781.5
D77	P73		69	M	2013.11.15--	19.25	19.25	352337		Yes	1	T2	N2	M0	IIIA	0	352337	2290.72	2259.22	2248.43	2291.22	2258.41	2232	2285.29	2241.24	2235.8	2291	2267.07	2258.57	2295.24	2267.68	2267	2291.22	2258.41	2232	2285.29	2241.24	2235.8	2291	2267.07	2258.57	2295.24	2267.68	2267	691615	427075	252905	719721	437983
D79	P74		47	M	2013.3.5--4.20	15.21	15.21		60/30	No	1	T2	N2	M0	IIIA	0	1089532	1902.16	1930.6	1887.81	1892.58	1909.04	1867.3	1915.11	1922.83	1764.17	1900.68	1940.48	1936.96	1900.6	1949.67	1951.95	1892.58	1909.04	1867.3	1915.11	1922.83	1764.17	1900.68	1940.48	1936.96	1900.6	1949.67	1951.95	345656	150710	117851	344604	114275
D81	P75		61	M	2013.6.3--	28.25	28.25	58.8/28	50.4/28	Yes	1	T3	N2	M0	IIIA	0	340837	2111.39	2077.59	2022.05	2115.11	2099.19	2072.44	2113.28	2079.65	2027.7	2106.53	2072.68	2018.04	2110.69	2057.29	1961.35	2115.11	2099.19	2072.44	2113.28	2079.65	2027.7	2106.53	2072.68	2018.04	2110.69	2057.29	1961.35	719396	338820	279807	691067	235481
D82	P76		60	M		25.2	25.2			No	1	T2	N1	M0	IIB	0	325220	1962.88	1852.4	1772.62	1968.19	1875.75	1734.58	1964.13	1802.41	1656.7	1959.87	1897.67	1863.31	1959.28	1820.98	1792.81	1968.19	1875.75	1734.58	1964.13	1802.41	1656.7	1959.87	1897.67	1863.31	1959.28	1820.98	1792.81	1.68034e+06	699075	446591	1.71043e+06	838695
D83	P77		54	M	2014.11.3--	3.58	6.74	40/20	36/20	Yes	1	T2	N1	M0	IIB	1	388126	2460.1	2447.72	2429.73	2461.56	2451.96	2428.79	2460.75	2443.8	2430.13	2456.66	2451.49	2440.95	2461.46	2443.07	2417.35	2461.56	2451.96	2428.79	2460.75	2443.8	2430.13	2456.66	2451.49	2440.95	2461.46	2443.07	2417.35	603453	314449	151436	613041	358473
D84	P78		67	F	2012.10.10--	27		60/30	54/30	Yes	1	T2	N2	M0	IIIA	0	323478	2307.99	2323.33	2318.69	2301.87	2320.87	2323.01	2315.89	2326.93	2308.91	2305.78	2315.95	2308.05	2308.64	2330.33	2334.39	2301.87	2320.87	2323.01	2315.89	2326.93	2308.91	2305.78	2315.95	2308.05	2308.64	2330.33	2334.39	334418	133704	95217.5	376458	174148
D85	P79		45	M	2014.10.5--	14.98	14.98	60/30	54/30	Yes	1	t2	N3	M0	IIIB	0	378505	2250.59	2244.82	2217.28	2246.32	2257.35	2246.11	2252.64	2219.31	2158.57	2251.43	2246.76	2225.53	2252.05	2255.41	2236.44	2246.32	2257.35	2246.11	2252.64	2219.31	2158.57	2251.43	2246.76	2225.53	2252.05	2255.41	2236.44	240152	115624	88820.5	261226	149069
D86	P80		58	M	2014.10.20--	12.12	12.22		60/30	Yes	1	T2	N3	M0	IIIB	1	1201539	2566.03	2570.95	2571.26	2564.24	2568.84	2569.79	2566.76	2572.58	2573.61	2566.35	2571.31	2572.81	2566.77	2571.21	2568.67	2564.24	2568.84	2569.79	2566.76	2572.58	2573.61	2566.35	2571.31	2572.81	2566.77	2571.21	2568.67	3998.5	960.056	937.264	3097.19	1306.73
D87	P81		59	M	2013.10.1--	26.05	26.05	60/30	54/30	Yes	1	T4	N3	M0	IIIB	0	353069	1962.32	1953.72	1939.27	1959.28	1942.05	1910.13	1964.59	1953.63	1927.41	1961.14	1966.93	1973.73	1964.36	1951.32	1939.87	1959.28	1942.05	1910.13	1964.59	1953.63	1927.41	1961.14	1966.93	1973.73	1964.36	1951.32	1939.87	825592	490445	410657	850329	479125
D88	P82		53	M	2013.6.1--	10.32	13.9	60/30	54/30	Yes	1	T2	N0	M0	IIA	1	331331	2199.64	2234.28	2247.33	2193.8	2223.25	2220.34	2204.93	2231.86	2230.6	2195.06	2234.91	2260.25	2205.03	2248.14	2280.19	2193.8	2223.25	2220.34	2204.93	2231.86	2230.6	2195.06	2234.91	2260.25	2205.03	2248.14	2280.19	558274	237313	175600	585647	227410
D89	P83		60	M	2013.1.4--2.20	12.48	15.15		60/30	Yes	2	T4	N3	M0	IIIB	1	310312	2248.63	2236.22	2212.75	2251.09	2251.81	2246.3	2250.45	2218.94	2210.07	2245.12	2235.05	2203.16	2248.03	2232.21	2191.17	2251.09	2251.81	2246.3	2250.45	2218.94	2210.07	2245.12	2235.05	2203.16	2248.03	2232.21	2191.17	497.443	325.552	283.271	492.556	361.574
D90	P84		67	M	2013.10.31--12.10	11.27	11.27	50/25	45/25	Yes	1	T2	N1	M0	IIB	0	348687	1879.57	1835.49	1759.95	1875.67	1843.37	1765.48	1881.63	1815.66	1702.48	1880.77	1859.14	1799.62	1880.29	1819.01	1764.56	1875.67	1843.37	1765.48	1881.63	1815.66	1702.48	1880.77	1859.14	1799.62	1880.29	1819.01	1764.56	745364	453189	253495	757488	507061
D91	P85		65	M	2013.5.3--6.10	28.19	30.23	60/30	54/30	Yes	1	T2	N2	M0	IIIA	0	340142	1937.78	1792.47	1675.67	1949.02	1863.09	1780.69	1929.57	1749.64	1631.28	1936.15	1781.34	1652.67	1935.98	1763.98	1594.85	1949.02	1863.09	1780.69	1929.57	1749.64	1631.28	1936.15	1781.34	1652.67	1935.98	1763.98	1594.85	2.55056e+06	1.57802e+06	923708	2.62661e+06	2.08015e+06
D92	P86		63	M	2013.3.25--4.21	2015.9.5			60/30	Yes	2	T3	N2	M0	IIIA	0	366012	1280.8	1235.19	1171.55	1286.03	1241.07	1142.93	1287.33	1221.33	1173.36	1274.45	1263.48	1224.3	1275.61	1210.54	1135.59	1286.03	1241.07	1142.93	1287.33	1221.33	1173.36	1274.45	1263.48	1224.3	1275.61	1210.54	1135.59	460659	236090	188935	466737	217373
D93	P87		58	F	2013.9.11--	6.54	9.49		60/30	No	1	T4	N1	M0	IIIA	1	342901	2241.23	2224.97	2213.25	2242.95	2231.36	2217.86	2238.58	2209.87	2189.85	2240.57	2228.32	2220.77	2242.8	2229.75	2223.2	2242.95	2231.36	2217.86	2238.58	2209.87	2189.85	2240.57	2228.32	2220.77	2242.8	2229.75	2223.2	1.10066e+06	712531	519754	1.12849e+06	800698
D94	P88		54	M	2012.9.30--	13.24	17.28		60/30	Yes	1	T4	N3	M0	IIIB	1	507575	2286.75	2228.47	2187.16	2293.65	2267.96	2234.62	2286.68	2202.39	2151.78	2284.55	2220.95	2164.8	2282.04	2218.98	2190.07	2293.65	2267.96	2234.62	2286.68	2202.39	2151.78	2284.55	2220.95	2164.8	2282.04	2218.98	2190.07	1.59074e+06	645893	319316	1.65238e+06	947007
D95	P89		49	M	2013.5.10--	15.8	18.04	60/30	54/30	Yes	2	T2	N3	M0	IIIB	1	341013	2164.32	2030.1	1943.61	2171.49	2093.42	1995.65	2166.52	2003.91	1894.36	2163.83	2026.98	1923.37	2155.01	1979.74	1942.04	2171.49	2093.42	1995.65	2166.52	2003.91	1894.36	2163.83	2026.98	1923.37	2155.01	1979.74	1942.04	1.81721e+06	935887	436869	1.84499e+06	1.24582e+06
D96	P90		63	M	2014.1.16--	5.22	9.79		60/30	Yes	1	T2	N2	M0	IIIA	1	1182360	2324.2	2339.61	2329.89	2323.54	2346.68	2342.9	2327.82	2350.11	2343.65	2315.1	2322.85	2316.54	2330.54	2339.86	2316.48	2323.54	2346.68	2342.9	2327.82	2350.11	2343.65	2315.1	2322.85	2316.54	2330.54	2339.86	2316.48	293280	102166	83899	305789	93926.3
D97	P91		54	M	2013.3.28--	25.36	25.36		60/30	Yes	1	T2	N3	M0	IIIB	0	330685	1872.17	1865.18	1866.2	1866.59	1859.17	1860.94	1867.21	1837.03	1826.96	1876.44	1875.47	1878.07	1878.35	1887.03	1892.93	1866.59	1859.17	1860.94	1867.21	1837.03	1826.96	1876.44	1875.47	1878.07	1878.35	1887.03	1892.93	802247	445480	334354	836069	535973
D98	P92		61	M	2014.9.23--	5.98	10.74		60/30	Yes	1	T3	N3	M0	IIIB	1	377592	1953.97	1902.94	1851.35	1956.13	1908.45	1855.28	1959.7	1920.98	1890.89	1955.23	1913.32	1877.3	1944.62	1865.44	1766.31	1956.13	1908.45	1855.28	1959.7	1920.98	1890.89	1955.23	1913.32	1877.3	1944.62	1865.44	1766.31	2.1464e+06	1.47314e+06	1.1315e+06	2.17516e+06	1.59114e+06
D100	P93		56	M	2014.11.20--	10.87	10.87		60/30	Yes	1	T2	N1	M0	IIA	0	1292488	2269.96	2266.72	2250.87	2267.23	2273.78	2263.94	2269.58	2258.33	2240.82	2265.46	2262.48	2246.42	2277.71	2272.18	2251.24	2267.23	2273.78	2263.94	2269.58	2258.33	2240.82	2265.46	2262.48	2246.42	2277.71	2272.18	2251.24	562015	238993	169816	604617	320994
D101	P94		41	M	2014.11.27--	11.01	11.01		62/31	Yes	1	T2	N3	M0	IIIB	0	1287366	1738.92	1652.92	1575.72	1746.18	1684.74	1615.54	1732.33	1610.84	1507.31	1738.42	1659.56	1587.6	1738.6	1653.12	1583.05	1746.18	1684.74	1615.54	1732.33	1610.84	1507.31	1738.42	1659.56	1587.6	1738.6	1653.12	1583.05	2.41431e+06	1.66708e+06	1.12596e+06	2.46293e+06	1.89798e+06
D102	P95		29	M	2014.9.10--	14.55	14.55		60/30	No	1	T2	N2	M0	IIIA	0	380871	1649.72	1675.68	1628.42	1634.96	1671.23	1670.83	1650.94	1676.22	1638.75	1647.33	1677.68	1623.25	1666.52	1678.53	1543.6	1634.96	1671.23	1670.83	1650.94	1676.22	1638.75	1647.33	1677.68	1623.25	1666.52	1678.53	1543.6	589628	301765	235162	648812	403591
D103	P96		62	M	2013.5.2-6.7	15.8	15.8		60/30	Yes	1	T4	N3	M0	IIIB	0	1063067	1912.15	1890.82	1870.81	1906.75	1889.03	1871.54	1907.67	1884.93	1882.22	1916.78	1904.63	1894.77	1917.3	1882.13	1825.98	1906.75	1889.03	1871.54	1907.67	1884.93	1882.22	1916.78	1904.63	1894.77	1917.3	1882.13	1825.98	657225	252616	220060	686073	224756
D105	P97		66	M	2013.11.30--12.18	8.64	8.64		60/30	Yes	2	T1	N1	M0	IIA	0	345575	1581.02	1525.23	1481.6	1588.08	1553.62	1519.93	1577.42	1507.96	1447.52	1578.28	1517.7	1473.49	1580.21	1519.63	1479.26	1588.08	1553.62	1519.93	1577.42	1507.96	1447.52	1578.28	1517.7	1473.49	1580.21	1519.63	1479.26	1.61486e+06	1.09998e+06	772730	1.64328e+06	1.21227e+06
D108	P98		65	M	2012.12.1--	16.13	18.86		60/30	Yes	1	T4	N2	M0	IIIB	1	316889	2238.04	2217.4	2195.89	2242.81	2238.34	2234.4	2240.15	2220.56	2206.63	2231.46	2201.52	2166.42	2237.72	2207.29	2167.64	2242.81	2238.34	2234.4	2240.15	2220.56	2206.63	2231.46	2201.52	2166.42	2237.72	2207.29	2167.64	879986	398651	266013	918280	420425
D109	P99		65	F	2013.12.20--	17.54	17.54	60/30	54/30	No	1	T2	N1	M0	IIB	0	357535	1819.89	1669.46	1572.75	1823.25	1683.81	1570.14	1798.48	1569.78	1564.46	1828.59	1699.66	1577	1828.57	1711.21	1577.32	1823.25	1683.81	1570.14	1798.48	1569.78	1564.46	1828.59	1699.66	1577	1828.57	1711.21	1577.32	1.00075e+06	486063	328839	1.03913e+06	515813
D110	P100		60	M	2014.11.11--2015.1.1	2015.7.30		60/30	54/30	Yes	1	T2	N3	M0	IIIB	0	393232	2481.76	2494.87	2498.62	2479.45	2494.93	2499.63	2485.82	2497.46	2499.88	2479.31	2492.03	2495.28	2482.56	2495.3	2500.1	2479.45	2494.93	2499.63	2485.82	2497.46	2499.88	2479.31	2492.03	2495.28	2482.56	2495.3	2500.1	47529.9	14053.1	10469.1	59013.3	17644.9
D113	P101		44	F	2014.5.30-7.15	24.67	24.67		47.6/28	No	1	T2	N3	M0	IIIB	0	351153	1834.12	1785.53	1736.52	1836.38	1789.36	1742.1	1829.56	1772.44	1709.01	1836.27	1801.84	1777.97	1834.2	1776.8	1708.99	1836.38	1789.36	1742.1	1829.56	1772.44	1709.01	1836.27	1801.84	1777.97	1834.2	1776.8	1708.99	2.34668e+06	1.57025e+06	1.14801e+06	2.38856e+06	1.60385e+06
D114	P102		61	F	2012.12.2--2013.1.10	14.39	15.41		54/30	Yes	1	T1	N2	M0	IIIA	1	323575	2047.68	1950.97	1923.06	2045.34	1959.25	1934.62	2031.26	1911.9	1909.53	2057.67	1970.62	1901.53	2056.19	1957.61	1948.97	2045.34	1959.25	1934.62	2031.26	1911.9	1909.53	2057.67	1970.62	1901.53	2056.19	1957.61	1948.97	1.21724e+06	542080	380617	1.30167e+06	639553
D115	P103		58	M	2014.11.16--2015.1.2	11.3	11.3		66/33	No	2	T3	N2	M0	IIIA	0	387950	2516.42	2525.34	2531.46	2518.5	2524.66	2529.39	2516.29	2524.33	2528.9	2513.2	2523.34	2529.68	2517.72	2529.32	2538.71	2518.5	2524.66	2529.39	2516.29	2524.33	2528.9	2513.2	2523.34	2529.68	2517.72	2529.32	2538.71	126537	44370	28310.3	113140	35172.5
D116	P104		48	M	2015.2.5-3.20	8.25	8.25		60/30	Yes	1	T2	N2	M0	IIIA	0	1335970	1977.08	1922.44	1861.89	1978.71	1953.24	1919.9	1974.17	1892.4	1818.6	1974.83	1920.55	1838.37	1980.6	1918.52	1852.58	1978.71	1953.24	1919.9	1974.17	1892.4	1818.6	1974.83	1920.55	1838.37	1980.6	1918.52	1852.58	1.10254e+06	437727	272628	1.15026e+06	502370
D117	P105		63	M	2014.4.24-6.10	8.02	8.02	60/30	54/30	Yes	2	T3	N3	M0	IIIB	0	1177957	2133.99	2130.91	2107.54	2132.35	2141.97	2137.43	2136.01	2114.07	2080.59	2132.7	2127.36	2091.17	2134.99	2137.87	2110.86	2132.35	2141.97	2137.43	2136.01	2114.07	2080.59	2132.7	2127.36	2091.17	2134.99	2137.87	2110.86	525141	285725	207388	555380	297304
D118	P106		60	F	2013.4.20--	13.8	27.47		60/30	No	1	T3	N2	M0	IIIA	1	331150	1814.04	1761.48	1660.18	1818.31	1774.92	1639.38	1807.01	1705.24	1595.14	1808.64	1789.09	1764.01	1822.31	1769.55	1592.13	1818.31	1774.92	1639.38	1807.01	1705.24	1595.14	1808.64	1789.09	1764.01	1822.31	1769.55	1592.13	1.99201e+06	906094	688400	2.00871e+06	818398
D119	P107		58	F	2014.8.12-9.12	14.62	14.62		60/30	Yes	1	T3	N2	M0	IIIA	0	1198180	1849.94	1746.07	1674.2	1858.22	1782.08	1719.29	1840.85	1705.52	1627.64	1849.97	1747.9	1681.12	1850.58	1745.47	1659.5	1858.22	1782.08	1719.29	1840.85	1705.52	1627.64	1849.97	1747.9	1681.12	1850.58	1745.47	1659.5	3.04477e+06	1.79413e+06	1.38688e+06	3.16675e+06	2.19126e+06
D120	P108		52	F	2014.11.28-12.30	7.72	7.72		50/25	Yes	1	T2	N2	M0	IIIA	0	379439	2313.63	2302.86	2283.8	2308.76	2294.29	2279.68	2312.59	2288.99	2246.76	2314.28	2310.17	2293.32	2318.97	2317.94	2313.37	2308.76	2294.29	2279.68	2312.59	2288.99	2246.76	2314.28	2310.17	2293.32	2318.97	2317.94	2313.37	650421	268211	162917	690200	338283
D121	P109		51	M	2014.10.8--11.30	2.76	3.68		48/24	Yes	1	T4	N3	M0	IIIB	1	384385	2217.54	2231.32	2226.61	2218.04	2234.01	2222	2222.46	2235.68	2227.76	2209.95	2224.64	2227.31	2219.94	2231.7	2229.85	2218.04	2234.01	2222	2222.46	2235.68	2227.76	2209.95	2224.64	2227.31	2219.94	2231.7	2229.85	307708	120669	102034	321485	152203
D122	P110		67	M		11.07	14.19			Yes	1	T2	N2	M0	IIIA	1	321652	2266.85	2151.46	2145.03	2268.39	2156.06	2096.89	2256.54	2104.62	2131.76	2275.96	2178.94	2149.86	2266.13	2160.89	2213.6	2268.39	2156.06	2096.89	2256.54	2104.62	2131.76	2275.96	2178.94	2149.86	2266.13	2160.89	2213.6	1.21919e+06	510283	284290	1.26652e+06	607955
D123	P111		56	F	2014.9.30--11.12	13.96	13.96	60/30	54/30	No	1	T4	N2	M0	IIIB	0	388327	2311.03	2312.72	2302.12	2310.05	2320.16	2305.49	2312.16	2288.33	2243.59	2309.06	2312.93	2296.16	2312.97	2325.63	2354.52	2310.05	2320.16	2305.49	2312.16	2288.33	2243.59	2309.06	2312.93	2296.16	2312.97	2325.63	2354.52	105694	69660.6	66106.4	111393	58884.6
D124	P112		46	M	2012.8.6--9.13	6.83	12.62	59.36/28	54.6/28	Yes	1	T2	N3	M0	IIIB	1	317531	2519.65	2529.95	2533.94	2518.01	2529.6	2532.04	2518.88	2522.35	2508.29	2519.06	2529.49	2535.61	2522.71	2538.72	2560.33	2518.01	2529.6	2532.04	2518.88	2522.35	2508.29	2519.06	2529.49	2535.61	2522.71	2538.72	2560.33	280011	107053	85587.3	300323	124154
D125	P113		52	M	2014.12.28--2015.2.10	3.84	3.84	50/25	45/25	Yes	1	T2	N2	M0	IIIA	0	389390	2405.86	2411.35	2424.38	2404.21	2408.93	2417.09	2407.08	2413.81	2438.5	2405.55	2409.05	2416.56	2406.62	2413.92	2427.22	2404.21	2408.93	2417.09	2407.08	2413.81	2438.5	2405.55	2409.05	2416.56	2406.62	2413.92	2427.22	978297	762561	548078	997855	823909
D126	P114		57	M	2014.7.1--8.10	16.26	16.26	60/30	54/30	Yes	1	T1	N3	M0	IIIB	1	309283	1961.76	1921.46	1828.12	1964.22	1949	1887.35	1960.42	1905.59	1791.75	1957.51	1920.97	1839.93	1964.99	1905.17	1762.69	1964.22	1949	1887.35	1960.42	1905.59	1791.75	1957.51	1920.97	1839.93	1964.99	1905.17	1762.69	748843	446315	360834	770738	442658
D127	P115		56	M	2014.11.1--12.17	12.42	12.42	58.8/28	50.4/28	Yes	1	T2	N2	M0	IIIA	0	384162	2324.29	2313.88	2299.36	2324.44	2314.97	2304.87	2323.51	2316.33	2313.24	2323.65	2318.29	2304.74	2325.58	2305.42	2272.87	2324.44	2314.97	2304.87	2323.51	2316.33	2313.24	2323.65	2318.29	2304.74	2325.58	2305.42	2272.87	719529	297555	194562	763858	344728
D128	P116		55	M	2014.8.21--9.24	10.05	10.05	60/30	54/30	Yes	1	T2	N2	M0	IIIA	0	372492	2519.52	2554.16	2591.17	2516	2532.18	2545.73	2518.56	2561.14	2625.97	2518.65	2561.21	2605.51	2524.98	2563.97	2597.84	2516	2532.18	2545.73	2518.56	2561.14	2625.97	2518.65	2561.21	2605.51	2524.98	2563.97	2597.84	102186	29410.4	23279.9	93718.4	19643.7
D129	P117		49	M	2014.11.20--12.31	12.12	12.12	60/30	54/30	Yes	1	T2	N2	M0	IIIA	0	387735	2163.14	2105.88	2050.85	2167.35	2140.55	2091.16	2160.43	2092.14	2048	2160.87	2104.95	2049.43	2163.87	2082.93	2008.15	2167.35	2140.55	2091.16	2160.43	2092.14	2048	2160.87	2104.95	2049.43	2163.87	2082.93	2008.15	1.42377e+06	836050	461414	1.46342e+06	1.17621e+06
D130	P118		50	F	2014.4.10--6.12	4.93	7.69	60/30	54/30	No	1	T2	N3	M0	IIIB	1	365037	2284.09	2235.67	2201.73	2286.71	2248.21	2215.22	2282.9	2222.94	2153.93	2286.27	2247.71	2209.54	2280.33	2219.55	2205.8	2286.71	2248.21	2215.22	2282.9	2222.94	2153.93	2286.27	2247.71	2209.54	2280.33	2219.55	2205.8	972606	504747	352018	1.00058e+06	552513
D131	P119		64	F	2012.8.13--	34.56	34.56	60/30	54/30	No	1	T2	N2	M0	IIIA	0	314152	2115.96	2089.89	2025.85	2121.66	2111.45	2059.34	2122.85	2083.2	2007.43	2102.22	2091.69	2048.35	2118.2	2068.99	1925.93	2121.66	2111.45	2059.34	2122.85	2083.2	2007.43	2102.22	2091.69	2048.35	2118.2	2068.99	1925.93	409908	177708	159763	377962	87478
D135	P120		54	M	2013.12.10--2014.1.10	22.8	22.8	60/30	54/30	No	1	T2	N2	M0	IIIA	0	361305	1396.93	1364.14	1315.78	1397.89	1378.65	1346.41	1386.76	1323.56	1231.57	1394.49	1373.55	1331.88	1409.08	1383.94	1378.94	1397.89	1378.65	1346.41	1386.76	1323.56	1231.57	1394.49	1373.55	1331.88	1409.08	1383.94	1378.94	971825	663650	568753	984994	609581
D136	P121		66	M	2013.11.20--	9.23	9.66		60/30	Yes	1	T4	N2	M0	IIIB	1	346730	1889.03	1923.6	1930.04	1885.4	1917.68	1934.1	1892.06	1932	1941.44	1887.52	1921.04	1932.76	1891.24	1924.24	1909.1	1885.4	1917.68	1934.1	1892.06	1932	1941.44	1887.52	1921.04	1932.76	1891.24	1924.24	1909.1	642630	308871	216268	686853	358226
D137	P122		47	M	2014.3.24--	14.88	16.85	56.7/27	45.9/27	No	1	T2	N2	M0	IIIA	1	357877	2073.88	2102.12	2099.41	2068	2090.36	2089.94	2077.25	2099.49	2079.62	2071.49	2102.68	2107.05	2078.91	2116.29	2118.2	2068	2090.36	2089.94	2077.25	2099.49	2079.62	2071.49	2102.68	2107.05	2078.91	2116.29	2118.2	504732	239642	169343	505932	198108
D138	P123		68	F	2013.9.26--	26.35	26.35		60/30	Yes	1	T2	N2	M0	IIIA	0	347080	2436.08	2411.85	2423.96	2440.29	2419.96	2423.74	2441.3	2431.88	2481.25	2428.85	2393.02	2384.48	2433.88	2402.08	2408.36	2440.29	2419.96	2423.74	2441.3	2431.88	2481.25	2428.85	2393.02	2384.48	2433.88	2402.08	2408.36	283970	94813.8	82340.3	329830	139324
D139	P124		48	F	2013.12.31--	16.66	16.66		60/30	No	1	T2	N2	M0	IIIA	0	358983	2151.65	2135.17	2108.5	2146.58	2134.54	2125.39	2150.34	2121.76	2096.89	2155.11	2151.66	2118.18	2154.66	2132.29	2088.94	2146.58	2134.54	2125.39	2150.34	2121.76	2096.89	2155.11	2151.66	2118.18	2154.66	2132.29	2088.94	617623	243123	170539	654920	311020
D140	P125		59	F	2014.8.28--	13.93	13.93	60/30	54/30	No	1	T2	N3	M0	IIIA	0	380173	2181.89	2150.46	2077.48	2184.01	2168.23	2123.25	2170.66	2108.91	1995.51	2180.23	2154.64	2094.12	2192.58	2164	2061.27	2184.01	2168.23	2123.25	2170.66	2108.91	1995.51	2180.23	2154.64	2094.12	2192.58	2164	2061.27	590547	275806	265624	591864	229203
D141	P126		60	F	2013.7.10--	22.05	22.05		60/30	No	1	T3	N2	M0	IIIA	1	1094440	1853.07	1791.62	1726.77	1857.3	1820.34	1773.43	1846.61	1758.41	1672.41	1851.06	1785.14	1721.47	1857.26	1800.87	1733.88	1857.3	1820.34	1773.43	1846.61	1758.41	1672.41	1851.06	1785.14	1721.47	1857.26	1800.87	1733.88	1.70893e+06	1.10551e+06	813789	1.75826e+06	1.34235e+06
D142	P127		45	M	2014.4.10--	2015.9.10			60/30	Yes	3	T4	N2	M0	IIIB	0	371436	1941.08	1803.17	1688.74	1955.3	1865.3	1766.24	1941.6	1782.87	1671.66	1942.62	1810.74	1688.04	1924.52	1748.18	1615.81	1955.3	1865.3	1766.24	1941.6	1782.87	1671.66	1942.62	1810.74	1688.04	1924.52	1748.18	1615.81	3.40783e+06	2.25792e+06	1.38983e+06	3.48825e+06	2.64839e+06
D143	P128		58	M	2014..12.30--	9.95	9.95			Yes	1	T2	N2	M0	IIIA	0	393069	2445.67	2430.02	2411.31	2448.89	2435.59	2391.51	2441.45	2407.17	2400.91	2437.77	2437.59	2435.26	2454.83	2437.5	2410.54	2448.89	2435.59	2391.51	2441.45	2407.17	2400.91	2437.77	2437.59	2435.26	2454.83	2437.5	2410.54	25845.2	10821.3	8998.7	24060.3	6356.9
D145	P129		50	M	2013.6.10--	28.52	28.52	60.9/29	52.2/29	No	1	T2	N1	M0	IIB	0	339394	2162.81	2127.62	2072.31	2160.59	2147.26	2092.44	2162.43	2107.82	2040.56	2159.32	2138.26	2093.11	2169.07	2113.62	2053.96	2160.59	2147.26	2092.44	2162.43	2107.82	2040.56	2159.32	2138.26	2093.11	2169.07	2113.62	2053.96	941688	353832	246970	1.00635e+06	421698
D146	P130		60	M	2014.11.20--	4.27	7.29	60/30		Yes	1	T2	N2	M0	IIIA	1	387837	2368.46	2381.99	2375.99	2367.96	2393.57	2382.5	2373.58	2384.35	2382.09	2362.38	2376.88	2376.88	2370.08	2372.73	2360.79	2367.96	2393.57	2382.5	2373.58	2384.35	2382.09	2362.38	2376.88	2376.88	2370.08	2372.73	2360.79	160961	55296.6	46209.1	174198	84377.3
D147	P131		68	M	2014.3.20--	15.51	15.51		50.4/33	No	1	T2	N2	M0	IIIA	0	362454	1912.81	1882.13	1828.75	1915.2	1905.19	1865.18	1908.65	1864.66	1800.34	1910.83	1883.6	1840.21	1916.59	1872.43	1798.5	1915.2	1905.19	1865.18	1908.65	1864.66	1800.34	1910.83	1883.6	1840.21	1916.59	1872.43	1798.5	588726	357644	283102	604366	396846
D149	P132		68	M	2012.11.14--	30.62	30.62		60/30	No	1	T2	N2	M0	IIIA	0	323672	1938.56	1850.75	1776.37	1939.74	1865.93	1799.34	1928.33	1805.15	1707.23	1943.82	1867.92	1793.95	1942.21	1860.71	1796.1	1939.74	1865.93	1799.34	1928.33	1805.15	1707.23	1943.82	1867.92	1793.95	1942.21	1860.71	1796.1	3.06865e+06	2.0939e+06	1.52383e+06	3.1177e+06	2.31216e+06
D150	P133		53	M	2014.7.23--	9.69	14,65		60/30	Yes	1	T2	N1	M0	IIB	1	378339	1679.58	1615.2	1551.19	1681.56	1621.52	1538.46	1674.42	1585.09	1518.49	1680.82	1642.23	1609.74	1681.46	1609.11	1528.55	1681.56	1621.52	1538.46	1674.42	1585.09	1518.49	1680.82	1642.23	1609.74	1681.46	1609.11	1528.55	1.51498e+06	1.08675e+06	781202	1.53873e+06	1.18741e+06
D151	P134		34	M	2014.11.1--	10.51	10.51		60/30	No	1	T2	N1	M0	IIB	0	389674	2083.75	2102.51	2088.41	2077.8	2098	2096.07	2086.31	2096.8	2072.22	2082.23	2104.52	2087.51	2088.77	2110.51	2095.51	2077.8	2098	2096.07	2086.31	2096.8	2072.22	2082.23	2104.52	2087.51	2088.77	2110.51	2095.51	545075	245940	175513	573484	297930
D152	P135		73	F	2013.9.30--	26.84	26.84		60/30	Yes	1	T4	N3	M0	IIIB	0	340141	2325.82	2282	2234.59	2327.76	2291.09	2238.99	2319.87	2249.91	2185.73	2325.63	2291.31	2254.41	2329.96	2294.02	2254.72	2327.76	2291.09	2238.99	2319.87	2249.91	2185.73	2325.63	2291.31	2254.41	2329.96	2294.02	2254.72	2.76772e+06	1.89828e+06	1.33294e+06	2.80367e+06	2.05781e+06
D153	P136		57	F	2012.7.10--8.30	16.3	17.05		60/30	No	1	T3	N2	M0	IIIA	1	313517	2426.96	2431.89	2433.2	2427.08	2432.36	2433.75	2428.61	2434.13	2435.38	2425.11	2428.36	2430	2427.06	2432.83	2433.89	2427.08	2432.36	2433.75	2428.61	2434.13	2435.38	2425.11	2428.36	2430	2427.06	2432.83	2433.89	28834.5	9693.85	7194.08	25500.4	5329.74
D154	P137		57	M	2012.12.09--	5.91	15.11		60/30	Yes	1	T4	N3	M0	IIIB	1	1025011	2021.69	1977.29	1952.5	2025.63	2009.37	1986.83	2025.01	1988.17	1973.24	2019	1973.12	1941.49	2017.06	1934.86	1901.42	2025.63	2009.37	1986.83	2025.01	1988.17	1973.24	2019	1973.12	1941.49	2017.06	1934.86	1901.42	917350	480190	337652	954197	640663
D155	P138		61	M	2014.2.24--4.5	16.33	16.33		60/30	No	1	T3	N2	M0	IIIA	0	1243815	1645.37	1617.54	1513.58	1649.56	1630.41	1499.66	1647.82	1566.24	1362.63	1631.72	1618.44	1579.13	1652.77	1654.73	1599.32	1649.56	1630.41	1499.66	1647.82	1566.24	1362.63	1631.72	1618.44	1579.13	1652.77	1654.73	1599.32	1.16582e+06	462889	361047	1.21476e+06	367585
D157	P139		57	M	2013.5.3--6.13	23.56	24.57		60/30	Yes	1	T2	N2	M0	IIIA	1	333531	1911.94	1889.37	1823.5	1914.61	1890.57	1790.4	1914.51	1874.86	1735.29	1909.97	1903.71	1894.26	1908.76	1885.03	1836.46	1914.61	1890.57	1790.4	1914.51	1874.86	1735.29	1909.97	1903.71	1894.26	1908.76	1885.03	1836.46	954899	439842	328040	948269	267997
D159	P140		54	M	2012.8.2--9.12	4.99	22.93	60/30	54/30	Yes	1	T2	N2	M0	IIIA	1	315026	2501.36	2494.13	2471.47	2497.99	2494.07	2474.36	2503.69	2487.92	2455.56	2500.58	2498.43	2479.69	2503.29	2495.64	2474.1	2497.99	2494.07	2474.36	2503.69	2487.92	2455.56	2500.58	2498.43	2479.69	2503.29	2495.64	2474.1	333019	189060	101560	348811	242222
[truncated: 640 more columns]

## Sheet: Terminology
patient characteristics and treatment regimen
median age, y(range)
median radiation dose,GY(rang)
treatment modality
Gender
No. patients with smoking history
VMAT=volumetric modulated arc therapy
IMRT=intensity-modulated radiotherapy
tumor location
LUL=left upper lobe
RLL=right lower lobe
RUL=right upper lobe
SBRT=stereotactic body radiotherapy
curative levels of radiation dose delivered in 3 or 5 fraction
radiomic feature quantification
as describled in detail below
